# Supplementary material for: Effectiveness of various bioreactors for thraustochytrid culture and production (Aurantiochytruim limacinum BUCHAXM 122)
Source: PeerJ. 2021 May 27;9:e11405. doi: 10.7717/peerj.11405 (PMC8164841; doi:10.7717/peerj.11405)
Supplement: Supplemental Information 5 [file peerj-09-11405-s005.xls]

## Sheet: kLa on spargers
kLa values in three bioreactors using different sparger configurations.
Shaker 200 rpm (R1)
minutes	Oxygen (mg/L)		DO (%)	C*-Cl	ln (C*-Cl)		minutes	ln (C*-Cl)
0	0.01	7.21	-0.138889	100.139	4.60656		0	4.60656
0.5	5.13	2.09	70.9722	29.0278	3.36825		0.5	3.36825
1	6.68	0.54	92.5	7.5	2.0149		1	2.0149
1.5	6.92	0.3	95.8333	4.16667	1.42712		1.5	1.42712
2	7	0.22	96.9444	3.05556	1.11696		2	1.11696
2.5	7.04	0.18	97.5	2.5	0.916291		2.5	0.916291
3	7.08	0.14	98.0556	1.94444	0.664976		3	0.664976
										m=-1.2923
										slope = Kla = -1.2923 per minute
										Kla=1.2923*60=		75.54	per hour
										kLa (30-90 s)		116.466	per hour
Shaker 200 rpm (R2)
minutes	Oxygen (mg/L)		DO (%)	C*-Cl	ln (C*-Cl)		minutes	ln (C*-Cl)
0	0.01	7.21	-0.138889	100.139	4.60656		0	4.60656
0.5	5.13	2.09	70.9722	29.0278	3.36825		0.5	3.36825
1	6.59	0.63	91.25	8.75	2.16905		1	2.16905
1.5	6.96	0.26	96.3889	3.61111	1.28402		1.5	1.28402
2	7.07	0.15	97.9167	2.08333	0.733969		2	0.733969
2.5	7.12	0.1	98.6111	1.38889	0.328504		2.5	0.328504
3	7.16	0.06	99.1667	0.833333	-0.182322		3	-0.182322
										kLa (30-90 s)	125.052	per hour
Shaker 200 rpm (R3)
minutes	Oxygen (mg/L)		DO (%)	C*-Cl	ln (C*-Cl)		minutes	ln (C*-Cl)
0	0.01	7.21	-0.138889	100.139	4.60656		0	4.60656
0.5	5.15	2.07	71.25	28.75	3.35864		0.5	3.35864
1	6.69	0.53	92.6389	7.36111	1.99621		1	1.99621
1.5	6.93	0.29	95.9722	4.02778	1.39321		1.5	1.39321
2	7	0.22	96.9444	3.05556	1.11696		2	1.11696
2.5	7.03	0.19	97.3611	2.63889	0.970358		2.5	0.970358
3	7.06	0.16	97.7778	2.22222	0.798508		3	0.798508
										kLa (30-90 s)	117.924	per hour
Shaker 200 rpm (R4)
minutes	Oxygen (mg/L)		DO (%)	C*-Cl	ln (C*-Cl)		minutes	ln (C*-Cl)
0	0.01	7.21	-0.138889	100.139	4.60656		0	4.60656
0.5	5.12	2.1	70.8333	29.1667	3.37303		0.5	3.37303
1	6.74	0.48	93.3333	6.66667	1.89712		1	1.89712
1.5	7.07	0.15	97.9167	2.08333	0.733969		1.5	0.733969
2	7.12	0.1	98.6111	1.38889	0.328504		2	0.328504
2.5	7.13	0.09	98.75	1.25	0.223144		2.5	0.223144
3	7.14	0.08	98.8889	1.11111	0.105361		3	0.105361
										kLa (30-90 s)	158.346	per hour
Shaker 200 rpm (R5)
minutes	Oxygen (mg/L)		DO (%)	C*-Cl	ln (C*-Cl)		minutes	ln (C*-Cl)
0	0.01	7.21	-0.138889	100.139	4.60656		0	4.60656
0.5	5.13	2.09	70.9722	29.0278	3.36825		0.5	3.36825
1	6.7	0.52	92.7778	7.22222	1.97716		1	1.97716
1.5	7.04	0.18	97.5	2.5	0.916291		1.5	0.916291
2	7.13	0.09	98.75	1.25	0.223144		2	0.223144
2.5	7.14	0.08	98.8889	1.11111	0.105361		2.5	0.105361
3	7.15	0.07	99.0278	0.972222	-0.0281709		3	-0.0281709
										kLa (30-90 s)	147.12	per hour
Shaker
200 rpm
R1	116.466
R2	125.052
R3	117.924
R4	158.346
R5	147.12
Mean	132.982
SD	18.7458
Stirred tank bioreactor																		Stirred tank bioreactor																			Stirred tank bioreactor
450 rpm 3 vvm with a silicone tube (R1)																		450 rpm 3 vvm with single coarse-bubble air stone (R1)																			450 rpm 3 vvm with single fine-bubble air stone (R1)
minutes	Oxygen (mg/L)		DO (%)	C*-Cl	ln (C*-Cl)		minutes	ln (C*-Cl)										minutes	Oxygen (mg/L)		DO (%)	C*-Cl	ln (C*-Cl)		minutes	ln (C*-Cl)											minutes	Oxygen (mg/L)		DO (%)	C*-Cl	ln (C*-Cl)		minutes	ln (C*-Cl)
0	0.01	6.79	0.147059	99.8529	4.6037		0	4.6037										0	0.01	6.99	0.142857	99.8571	4.60374		0	4.60374											0	0.01	7.09	0.140845	99.8592	4.60376		0	4.60376
0.5	0.89	5.91	13.0882	86.9118	4.46489		0.5	4.46489										0.5	2.26	4.74	32.2857	67.7143	4.2153		0.5	4.2153											0.5	2.83	4.27	39.8592	60.1408	4.09669		0.5	4.09669
1	1.75	5.05	25.7353	74.2647	4.30764		1	4.30764										1	3.99	3.01	57	43	3.7612		1	3.7612											1	4.73	2.37	66.6197	33.3803	3.50797		1	3.50797
1.5	2.47	4.33	36.3235	63.6765	4.15382		1.5	4.15382										1.5	5.1	1.9	72.8571	27.1429	3.30111		1.5	3.30111											1.5	5.95	1.15	83.8028	16.1972	2.78484		1.5	2.78484
2	3.27	3.53	48.0882	51.9118	3.94955		2	3.94955										2	5.83	1.17	83.2857	16.7143	2.81626		2	2.81626											2	6.51	0.59	91.6901	8.30986	2.11744		2	2.11744
2.5	3.8	3	55.8824	44.1176	3.78686		2.5	3.78686										2.5	6.27	0.73	89.5714	10.4286	2.34455		2.5	2.34455											2.5	6.81	0.29	95.9155	4.08451	1.4072		2.5	1.4072
3	4.16	2.64	61.1765	38.8235	3.65903		3	3.65903										3	6.56	0.44	93.7143	6.28571	1.83828		3	1.83828											3	6.97	0.13	98.169	1.83099	0.604855		3	0.604855
									kLa (30-90 s)		18.666	per hour
																																														kLa (30-90 s)		78.714	per hour
																											kLa (30-90 s)		54.852	per hour
																		Stirred tank bioreactor																			Stirred tank bioreactor
																		450 rpm 3 vvm with single coarse-bubble air stone (R2)																			450 rpm 3 vvm with single fine-bubble air stone (R2)
Stirred tank bioreactor
450 rpm 3 vvm with a silicone tube (R2)																		minutes	Oxygen (mg/L)		DO (%)	C*-Cl	ln (C*-Cl)		minutes	ln (C*-Cl)											minutes	Oxygen (mg/L)		DO (%)	C*-Cl	ln (C*-Cl)		minutes	ln (C*-Cl)
minutes	Oxygen (mg/L)		DO (%)	C*-Cl	ln (C*-Cl)		minutes	ln (C*-Cl)										0	0.01	6.99	0.142857	99.8571	4.60374		0	4.60374											0	0.01	7.09	0.140845	99.8592	4.60376		0	4.60376
0	0.01	6.79	0.147059	99.8529	4.6037		0	4.6037										0.5	2.22	4.78	31.7143	68.2857	4.2237		0.5	4.2237											0.5	2.88	4.22	40.5634	59.4366	4.08491		0.5	4.08491
0.5	0.9	5.9	13.2353	86.7647	4.4632		0.5	4.4632										1	3.92	3.08	56	44	3.78419		1	3.78419											1	4.79	2.31	67.4648	32.5352	3.48232		1	3.48232
1	1.76	5.04	25.8824	74.1176	4.30565		1	4.30565										1.5	4.98	2.02	71.1429	28.8571	3.36236		1.5	3.36236											1.5	5.81	1.29	81.831	18.169	2.89972		1.5	2.89972
1.5	2.53	4.27	37.2059	62.7941	4.13986		1.5	4.13986										2	5.7	1.3	81.4286	18.5714	2.92162		2	2.92162											2	6.54	0.56	92.1127	7.88732	2.06526		2	2.06526
2	3.17	3.63	46.6176	53.3824	3.97748		2	3.97748										2.5	6.16	0.84	88	12	2.48491		2.5	2.48491											2.5	6.91	0.19	97.3239	2.67606	0.984344		2.5	0.984344
2.5	3.7	3.1	54.4118	45.5882	3.81965		2.5	3.81965										3	6.46	0.54	92.2857	7.71429	2.04307		3	2.04307											3	6.96	0.14	98.0282	1.97183	0.678963		3	0.678963
3	4.15	2.65	61.0294	38.9706	3.66281		3	3.66281
																											kLa (30-90 s)		51.678	per hour																kLa (30-90 s)		71.112	per hour
									kLa (30-90 s)		19.398	per hour
Stirred tank bioreactor																		Stirred tank bioreactor																			Stirred tank bioreactor
450 rpm 3 vvm with a silicone tube (R3)																		450 rpm 3 vvm with single coarse-bubble air stone (R3)																			450 rpm 3 vvm with single fine-bubble air stone (R3)
minutes	Oxygen (mg/L)		DO (%)	C*-Cl	ln (C*-Cl)		minutes	ln (C*-Cl)										minutes	Oxygen (mg/L)		DO (%)	C*-Cl	ln (C*-Cl)		minutes	ln (C*-Cl)											minutes	Oxygen (mg/L)		DO (%)	C*-Cl	ln (C*-Cl)		minutes	ln (C*-Cl)
0	0.01	6.79	0.147059	99.8529	4.6037		0	4.6037										0	0.01	6.99	0.142857	99.8571	4.60374		0	4.60374											0	0.01	7.09	0.140845	99.8592	4.60376		0	4.60376
0.5	0.9	5.9	13.2353	86.7647	4.4632		0.5	4.4632										0.5	2.22	4.78	31.7143	68.2857	4.2237		0.5	4.2237											0.5	2.99	4.11	42.1127	57.8873	4.0585		0.5	4.0585
1	1.74	5.06	25.5882	74.4118	4.30961		1	4.30961										1	3.89	3.11	55.5714	44.4286	3.79388		1	3.79388											1	4.73	2.37	66.6197	33.3803	3.50797		1	3.50797
1.5	2.47	4.33	36.3235	63.6765	4.15382		1.5	4.15382										1.5	4.98	2.02	71.1429	28.8571	3.36236		1.5	3.36236											1.5	5.97	1.13	84.0845	15.9155	2.76729		1.5	2.76729
2	3.12	3.68	45.8824	54.1176	3.99116		2	3.99116										2	5.68	1.32	81.1429	18.8571	2.93689		2	2.93689											2	6.55	0.55	92.2535	7.74648	2.04724		2	2.04724
2.5	3.65	3.15	53.6765	46.3235	3.83565		2.5	3.83565										2.5	6.14	0.86	87.7143	12.2857	2.50844		2.5	2.50844											2.5	6.82	0.28	96.0563	3.94366	1.37211		2.5	1.37211
3	4	2.8	58.8235	41.1765	3.71787		3	3.71787										3	6.41	0.59	91.5714	8.42857	2.13163		3	2.13163											3	6.93	0.17	97.6056	2.39437	0.873119		3	0.873119
																											kLa (30-90 s)		51.678	per hour																kLa (30-90 s)		77.472	per hour
									kLa (30-90 s)		18.564	per hour
Stirred tank bioreactor																		Stirred tank bioreactor																			Stirred tank bioreactor
450 rpm 3 vvm with a silicone tube (R4)																		450 rpm 3 vvm with single coarse-bubble air stone (R4)																			450 rpm 3 vvm with single fine-bubble air stone (R4)
																		minutes	Oxygen (mg/L)		DO (%)	C*-Cl	ln (C*-Cl)		minutes	ln (C*-Cl)											minutes	Oxygen (mg/L)		DO (%)	C*-Cl	ln (C*-Cl)		minutes	ln (C*-Cl)
minutes	Oxygen (mg/L)		DO (%)	C*-Cl	ln (C*-Cl)		minutes	ln (C*-Cl)										0	0.01	6.99	0.142857	99.8571	4.60374		0	4.60374											0	0.01	7.09	0.140845	99.8592	4.60376		0	4.60376
0	0.01	6.79	0.147059	99.8529	4.6037		0	4.6037										0.5	2.18	4.82	31.1429	68.8571	4.23203		0.5	4.23203											0.5	2.85	4.25	40.1408	59.8592	4.09199		0.5	4.09199
0.5	0.91	5.89	13.3824	86.6176	4.4615		0.5	4.4615										1	3.89	3.11	55.5714	44.4286	3.79388		1	3.79388											1	4.75	2.35	66.9014	33.0986	3.49949		1	3.49949
1	1.8	5	26.4706	73.5294	4.29769		1	4.29769										1.5	4.99	2.01	71.2857	28.7143	3.35739		1.5	3.35739											1.5	5.99	1.11	84.3662	15.6338	2.74944		1.5	2.74944
1.5	2.42	4.38	35.5882	64.4118	4.1653		1.5	4.1653										2	5.73	1.27	81.8571	18.1429	2.89828		2	2.89828											2	6.56	0.54	92.3944	7.60563	2.02889		2	2.02889
2	3.11	3.69	45.7353	54.2647	3.99387		2	3.99387										2.5	6.19	0.81	88.4286	11.5714	2.44854		2.5	2.44854											2.5	6.86	0.24	96.6197	3.38028	1.21796		2.5	1.21796
2.5	3.7	3.1	54.4118	45.5882	3.81965		2.5	3.81965										3	6.48	0.52	92.5714	7.42857	2.00533		3	2.00533											3	6.97	0.13	98.169	1.83099	0.604855		3	0.604855
3	4.08	2.72	60	40	3.68888		3	3.68888
									kLa (30-90 s)		17.772	per hour															kLa (30-90 s)		52.476	per hour																kLa (30-90 s)		80.556	per hour
Stirred tank bioreactor																		Stirred tank bioreactor																			Stirred tank bioreactor
450 rpm 3 vvm with a silicone tube (R5)																		450 rpm 3 vvm with single coarse-bubble air stone (R5)																			450 rpm 3 vvm with single fine-bubble air stone (R5)
																		minutes	Oxygen (mg/L)		DO (%)	C*-Cl	ln (C*-Cl)		minutes	ln (C*-Cl)											minutes	Oxygen (mg/L)		DO (%)	C*-Cl	ln (C*-Cl)		minutes	ln (C*-Cl)
minutes	Oxygen (mg/L)		DO (%)	C*-Cl	ln (C*-Cl)		minutes	ln (C*-Cl)										0	0.01	6.99	0.142857	99.8571	4.60374		0	4.60374											0	0.01	7.09	0.140845	99.8592	4.60376		0	4.60376
0	0.01	6.79	0.147059	99.8529	4.6037		0	4.6037										0.5	2.25	4.75	32.1429	67.8571	4.2174		0.5	4.2174											0.5	2.89	4.21	40.7042	59.2958	4.08254		0.5	4.08254
0.5	0.92	5.88	13.5294	86.4706	4.4598		0.5	4.4598										1	3.91	3.09	55.8571	44.1429	3.78743		1	3.78743											1	4.71	2.39	66.338	33.662	3.51637		1	3.51637
1	1.73	5.07	25.4412	74.5588	4.31159		1	4.31159										1.5	5	2	71.4286	28.5714	3.35241		1.5	3.35241											1.5	5.87	1.23	82.6761	17.3239	2.85209		1.5	2.85209
1.5	2.46	4.34	36.1765	63.8235	4.15612		1.5	4.15612										2	5.76	1.24	82.2857	17.7143	2.87437		2	2.87437											2	6.53	0.57	91.9718	8.02817	2.08296		2	2.08296
2	3.16	3.64	46.4706	53.5294	3.98023		2	3.98023										2.5	6.17	0.83	88.1429	11.8571	2.47293		2.5	2.47293											2.5	6.81	0.29	95.9155	4.08451	1.4072		2.5	1.4072
2.5	3.72	3.08	54.7059	45.2941	3.81318		2.5	3.81318										3	6.48	0.52	92.5714	7.42857	2.00533		3	2.00533											3	6.9	0.2	97.1831	2.8169	1.03564		3	1.03564
3	4.11	2.69	60.4412	39.5588	3.67779		3	3.67779
									kLa (30-90 s)		18.222	per hour
																																														kLa (30-90 s)		73.824	per hour
																											kLa (30-90 s)		51.9	per hour
Stirred tank bioreactor																		Stirred tank bioreactor																			Stirred tank bioreactor
450 rpm 3 vvm with a silicone tube																		450 rpm 3 vvm with single coarse-bubble air stone																			450 rpm 3 vvm with single fine-bubble air stone
R1	18.666																	R1	54.852																		R1	78.714
R2	19.398																	R2	51.678																		R2	71.112
R3	18.564																	R3	51.678																		R3	77.472
R4	17.772																	R4	52.476																		R4	80.556
R5	18.222																	R5	51.9																		R5	73.824
Mean	18.5244																	Mean	52.5168																		Mean	76.3356
SD	0.600489																	SD	1.34559																		SD	3.81949
Bubble column bioreactor																		Bubble column bioreactor																			Bubble column bioreactor
3 vvm with a silicone tube (R1)																		3 vvm with single coarse-bubble air stone (R1)																			3 vvm with single fine-bubble air stone (R1)
minutes	Oxygen (mg/L)		DO (%)	C*-Cl	ln (C*-Cl)		minutes	ln (C*-Cl)										minutes	Oxygen (mg/L)		DO (%)	C*-Cl	ln (C*-Cl)		minutes	ln (C*-Cl)											minutes	Oxygen (mg/L)		DO (%)	C*-Cl	ln (C*-Cl)		minutes	ln (C*-Cl)
0	0.01	6.74	0.148148	99.8519	4.60369		0	4.60369										0	0.01	6.84	0.145985	99.854	4.60371		0	4.60371											0	0.01	6.99	0.142857	99.8571	4.60374		0	4.60374
0.5	1.13	5.62	16.7407	83.2593	4.42196		0.5	4.42196										0.5	2.13	4.72	31.0949	68.9051	4.23273		0.5	4.23273											0.5	2.51	4.49	35.8571	64.1429	4.16111		0.5	4.16111
1	2.12	4.63	31.4074	68.5926	4.22818		1	4.22818										1	3.68	3.17	53.7226	46.2774	3.83465		1	3.83465											1	4.58	2.42	65.4286	34.5714	3.54303		1	3.54303
1.5	2.89	3.86	42.8148	57.1852	4.04629		1.5	4.04629										1.5	4.76	2.09	69.4891	30.5109	3.41809		1.5	3.41809											1.5	5.46	1.54	78	22	3.09104		1.5	3.09104
2	3.5	3.25	51.8519	48.1481	3.87428		2	3.87428										2	5.47	1.38	79.854	20.146	3.00301		2	3.00301											2	5.98	1.02	85.4286	14.5714	2.67906		2	2.67906
2.5	4.15	2.6	61.4815	38.5185	3.65114		2.5	3.65114										2.5	5.85	1	85.4015	14.5985	2.68092		2.5	2.68092											2.5	6.3	0.7	90	10	2.30259		2.5	2.30259
3	4.57	2.18	67.7037	32.2963	3.47495		3	3.47495										3	6.18	0.67	90.219	9.78102	2.28044		3	2.28044											3	6.49	0.51	92.7143	7.28571	1.98592		3	1.98592
										kLa (30-90 s)		22.542	per hour
																											kLa (30-90 s)		48.876	per hour
																																															kLa (30-90 s)	64.206	per hour
																																					Bubble column bioreactor
																																					3 vvm with single fine-bubble air stone (R2)
Bubble column bioreactor																		Bubble column bioreactor
3 vvm with a silicone tube (R2)																		3 vvm with single coarse-bubble air stone (R2)																			minutes	Oxygen (mg/L)		DO (%)	C*-Cl	ln (C*-Cl)		minutes	ln (C*-Cl)
																		minutes	Oxygen (mg/L)		DO (%)	C*-Cl	ln (C*-Cl)		minutes	ln (C*-Cl)											0	0.01	6.99	0.142857	99.8571	4.60374		0	4.60374
minutes	Oxygen (mg/L)		DO (%)	C*-Cl	ln (C*-Cl)		minutes	ln (C*-Cl)										0	0.01	6.84	0.145985	99.854	4.60371		0	4.60371											0.5	2.69	4.31	38.4286	61.5714	4.1202		0.5	4.1202
0	0.01	6.74	0.148148	99.8519	4.60369		0	4.60369										0.5	2.28	4.57	33.2847	66.7153	4.20043		0.5	4.20043											1	4.6	2.4	65.7143	34.2857	3.53473		1	3.53473
0.5	1.13	5.62	16.7407	83.2593	4.42196		0.5	4.42196										1	3.85	3	56.2044	43.7956	3.77953		1	3.77953											1.5	5.51	1.49	78.7143	21.2857	3.05804		1.5	3.05804
1	2.12	4.63	31.4074	68.5926	4.22818		1	4.22818										1.5	4.85	2	70.8029	29.1971	3.37407		1.5	3.37407											2	5.97	1.03	85.2857	14.7143	2.68882		2	2.68882
1.5	2.94	3.81	43.5556	56.4444	4.03326		1.5	4.03326										2	5.57	1.28	81.3139	18.6861	2.92778		2	2.92778											2.5	6.29	0.71	89.8571	10.1429	2.31677		2.5	2.31677
2	3.63	3.12	53.7778	46.2222	3.83346		2	3.83346										2.5	6.03	0.82	88.0292	11.9708	2.48247		2.5	2.48247											3	6.42	0.58	91.7143	8.28571	2.11453		3	2.11453
2.5	4.19	2.56	62.0741	37.9259	3.63563		2.5	3.63563										3	6.21	0.64	90.6569	9.34307	2.23463		3	2.23463
3	4.62	2.13	68.4444	31.5556	3.45175		3	3.45175
																																															kLa (30-90 s)	63.732	per hour
										kLa (30-90 s)		23.322	per hour														kLa (30-90 s)		49.584	per hour
Bubble column bioreactor																		Bubble column bioreactor																			Bubble column bioreactor
3 vvm with a silicone tube (R3)																		3 vvm with single coarse-bubble air stone (R3)																			3 vvm with single fine-bubble air stone (R3)
minutes	Oxygen (mg/L)		DO (%)	C*-Cl	ln (C*-Cl)		minutes	ln (C*-Cl)										minutes	Oxygen (mg/L)		DO (%)	C*-Cl	ln (C*-Cl)		minutes	ln (C*-Cl)											minutes	Oxygen (mg/L)		DO (%)	C*-Cl	ln (C*-Cl)		minutes	ln (C*-Cl)
0	0.01	6.74	0.148148	99.8519	4.60369		0	4.60369										0	0.01	6.84	0.145985	99.854	4.60371		0	4.60371											0	0.01	6.99	0.142857	99.8571	4.60374		0	4.60374
0.5	1.12	5.63	16.5926	83.4074	4.42374		0.5	4.42374										0.5	2.16	4.69	31.5328	68.4672	4.22635		0.5	4.22635											0.5	2.59	4.41	37	63	4.14313		0.5	4.14313
1	2.13	4.62	31.5556	68.4444	4.22602		1	4.22602										1	3.79	3.06	55.3285	44.6715	3.79934		1	3.79934											1	4.59	2.41	65.5714	34.4286	3.53889		1	3.53889
1.5	2.94	3.81	43.5556	56.4444	4.03326		1.5	4.03326										1.5	4.88	1.97	71.2409	28.7591	3.35896		1.5	3.35896											1.5	5.42	1.58	77.4286	22.5714	3.11668		1.5	3.11668
2	3.64	3.11	53.9259	46.0741	3.83025		2	3.83025										2	5.58	1.27	81.4599	18.5401	2.91994		2	2.91994											2	6.03	0.97	86.1429	13.8571	2.6288		2	2.6288
2.5	4.19	2.56	62.0741	37.9259	3.63563		2.5	3.63563										2.5	6.02	0.83	87.8832	12.1168	2.49459		2.5	2.49459											2.5	6.24	0.76	89.1429	10.8571	2.38482		2.5	2.38482
3	4.66	2.09	69.037	30.963	3.43279		3	3.43279										3	6.28	0.57	91.6788	8.32117	2.1188		3	2.1188											3	6.4	0.6	91.4286	8.57143	2.14843		3	2.14843
																																															kLa (30-90 s)	61.584	per hour
										kLa (30-90 s)		23.43	per hour														kLa (30-90 s)		52.044	per hour
Bubble column bioreactor																		Bubble column bioreactor																			Bubble column bioreactor
3 vvm with a silicone tube (R4)																		3 vvm with single coarse-bubble air stone (R4)																			3 vvm with single fine-bubble air stone (R4)
																																					minutes	Oxygen (mg/L)		DO (%)	C*-Cl	ln (C*-Cl)		minutes	ln (C*-Cl)
minutes	Oxygen (mg/L)		DO (%)	C*-Cl	ln (C*-Cl)		minutes	ln (C*-Cl)										minutes	Oxygen (mg/L)		DO (%)	C*-Cl	ln (C*-Cl)		minutes	ln (C*-Cl)											0	0.01	6.99	0.142857	99.8571	4.60374		0	4.60374
0	0.01	6.74	0.148148	99.8519	4.60369		0	4.60369										0	0.01	6.84	0.145985	99.854	4.60371		0	4.60371											0.5	2.52	4.48	36	64	4.15888		0.5	4.15888
0.5	1.14	5.61	16.8889	83.1111	4.42018		0.5	4.42018										0.5	2.1	4.75	30.6569	69.3431	4.23907		0.5	4.23907											1	4.68	2.32	66.8571	33.1429	3.50083		1	3.50083
1	2.12	4.63	31.4074	68.5926	4.22818		1	4.22818										1	3.74	3.11	54.5985	45.4015	3.81554		1	3.81554											1.5	5.5	1.5	78.5714	21.4286	3.06473		1.5	3.06473
1.5	2.93	3.82	43.4074	56.5926	4.03588		1.5	4.03588										1.5	4.78	2.07	69.781	30.219	3.40847		1.5	3.40847											2	6	1	85.7143	14.2857	2.65926		2	2.65926
2	3.62	3.13	53.6296	46.3704	3.83666		2	3.83666										2	5.52	1.33	80.5839	19.4161	2.9661		2	2.9661											2.5	6.21	0.79	88.7143	11.2857	2.42354		2.5	2.42354
2.5	4.2	2.55	62.2222	37.7778	3.63172		2.5	3.63172										2.5	5.92	0.93	86.4234	13.5766	2.60835		2.5	2.60835											3	6.46	0.54	92.2857	7.71429	2.04307		3	2.04307
3	4.61	2.14	68.2963	31.7037	3.45643		3	3.45643										3	6.25	0.6	91.2409	8.75912	2.1701		3	2.1701
										kLa (30-90 s)		23.058	per hour														kLa (30-90 s)		49.836	per hour																	kLa (30-90 s)	65.652	per hour
Bubble column bioreactor																		Bubble column bioreactor																			Bubble column bioreactor
3 vvm with a silicone tube (R5)																		3 vvm with single coarse-bubble air stone (R5)																			3 vvm with single fine-bubble air stone (R5)
																																					minutes	Oxygen (mg/L)		DO (%)	C*-Cl	ln (C*-Cl)		minutes	ln (C*-Cl)
minutes	Oxygen (mg/L)		DO (%)	C*-Cl	ln (C*-Cl)		minutes	ln (C*-Cl)										minutes	Oxygen (mg/L)		DO (%)	C*-Cl	ln (C*-Cl)		minutes	ln (C*-Cl)											0	0.01	6.99	0.142857	99.8571	4.60374		0	4.60374
0	0.01	6.74	0.148148	99.8519	4.60369		0	4.60369										0	0.01	6.84	0.145985	99.854	4.60371		0	4.60371											0.5	2.78	4.22	39.7143	60.2857	4.0991		0.5	4.0991
0.5	1.12	5.63	16.5926	83.4074	4.42374		0.5	4.42374										0.5	2.17	4.68	31.6788	68.3212	4.22422		0.5	4.22422											1	4.54	2.46	64.8571	35.1429	3.55942		1	3.55942
1	2.13	4.62	31.5556	68.4444	4.22602		1	4.22602										1	3.77	3.08	55.0365	44.9635	3.80585		1	3.80585											1.5	5.46	1.54	78	22	3.09104		1.5	3.09104
1.5	2.92	3.83	43.2593	56.7407	4.03849		1.5	4.03849										1.5	4.86	1.99	70.9489	29.0511	3.36906		1.5	3.36906											2	5.96	1.04	85.1429	14.8571	2.69848		2	2.69848
2	3.54	3.21	52.4444	47.5556	3.8619		2	3.8619										2	5.43	1.42	79.2701	20.7299	3.03158		2	3.03158											2.5	6.25	0.75	89.2857	10.7143	2.37158		2.5	2.37158
2.5	4.16	2.59	61.6296	38.3704	3.64729		2.5	3.64729										2.5	5.9	0.95	86.1314	13.8686	2.62963		2.5	2.62963											3	6.45	0.55	92.1429	7.85714	2.06142		3	2.06142
3	4.67	2.08	69.1852	30.8148	3.428		3	3.428										3	6.29	0.56	91.8248	8.17518	2.1011		3	2.1011
										kLa (30-90 s)		23.112	per hour														kLa (30-90 s)		51.312	per hour																	kLa (30-90 s)	60.486	per hour
Bubble column bioreactor																		Bubble column bioreactor																			Bubble column bioreactor
3 vvm with a silicone tube																		3 vvm with single coarse-bubble air stone																			3 vvm with single fine-bubble air stone
R1	22.542																	R1	48.876																		R1	64.206
R2	23.322																	R2	49.584																		R2	63.732
R3	23.43																	R3	52.044																		R3	61.584
R4	23.058																	R4	49.836																		R4	65.652
R5	23.112																	R5	51.312																		R5	60.486
Mean	23.0928																	Mean	50.3304																		Mean	63.132
SD	0.343219																	SD	1.30545																		SD	2.07735
Internal loop airlift																		Internal loop airlift																			Internal loop airlift
3 vvm with a silicone tube (R1)																		3 vvm with single coarse-bubble air stone (R1)																			3 vvm with single fine-bubble air stone (R1)
minutes	Oxygen (mg/L)		DO (%)	C*-Cl	ln (C*-Cl)		minutes	ln (C*-Cl)										minutes	Oxygen (mg/L)		DO (%)	C*-Cl	ln (C*-Cl)		minutes	ln (C*-Cl)											minutes	Oxygen (mg/L)		DO (%)	C*-Cl	ln (C*-Cl)		minutes	ln (C*-Cl)
0	0.01	6.99	0.142857	99.8571	4.60374		0	4.60374										0	0.01	6.99	0.142857	99.8571	4.60374		0	4.60374											0	0.01	6.99	0.142857	99.8571	4.60374		0	4.60374
0.5	1.38	5.62	19.7143	80.2857	4.38559		0.5	4.38559										0.5	2.06	4.94	29.4286	70.5714	4.25663		0.5	4.25663											0.5	2.51	4.49	35.8571	64.1429	4.16111		0.5	4.16111
1	2.69	4.31	38.4286	61.5714	4.1202		1	4.1202										1	4.62	2.38	66	34	3.52636		1	3.52636											1	5.26	1.74	75.1429	24.8571	3.21315		1	3.21315
1.5	3.74	3.26	53.4286	46.5714	3.84099		1.5	3.84099										1.5	6.12	0.88	87.4286	12.5714	2.53143		1.5	2.53143											1.5	6.47	0.53	92.4286	7.57143	2.02438		1.5	2.02438
2	4.54	2.46	64.8571	35.1429	3.55942		2	3.55942										2	6.62	0.38	94.5714	5.42857	1.69168		2	1.69168											2	6.73	0.27	96.1429	3.85714	1.34993		2	1.34993
2.5	5.21	1.79	74.4286	25.5714	3.24148		2.5	3.24148										2.5	6.72	0.28	96	4	1.38629		2.5	1.38629											2.5	6.83	0.17	97.5714	2.42857	0.887303		2.5	0.887303
3	5.69	1.31	81.2857	18.7143	2.92929		3	2.92929										3	6.87	0.13	98.1429	1.85714	0.619039		3	0.619039											3	6.87	0.13	98.1429	1.85714	0.619039		3	0.619039
									kLa 30-90 s		32.676	per hour															kLa (30-90 s)		103.512	per hour
																																														kLa (30-90 s)		128.202	per hour
																		Internal loop airlift																			Internal loop airlift
Internal loop airlift																		3 vvm with single coarse-bubble air stone (R2)																			3 vvm with single fine-bubble air stone (R2)
3 vvm with a silicone tube (R2)
																		minutes	Oxygen (mg/L)		DO (%)	C*-Cl	ln (C*-Cl)		minutes	ln (C*-Cl)											minutes	Oxygen (mg/L)		DO (%)	C*-Cl	ln (C*-Cl)		minutes	ln (C*-Cl)
minutes	Oxygen (mg/L)		DO (%)	C*-Cl	ln (C*-Cl)		minutes	ln (C*-Cl)										0	0.01	6.99	0.142857	99.8571	4.60374		0	4.60374											0	0.01	6.99	0.142857	99.8571	4.60374		0	4.60374
0	0.01	6.99	0.142857	99.8571	4.60374		0	4.60374										0.5	2.21	4.79	31.5714	68.4286	4.22579		0.5	4.22579											0.5	2.57	4.43	36.7143	63.2857	4.14766		0.5	4.14766
0.5	1.5	5.5	21.4286	78.5714	4.36401		0.5	4.36401										1	4.6	2.4	65.7143	34.2857	3.53473		1	3.53473											1	5.24	1.76	74.8571	25.1429	3.22457		1	3.22457
1	2.73	4.27	39	61	4.11087		1	4.11087										1.5	6.28	0.72	89.7143	10.2857	2.33076		1.5	2.33076											1.5	6.47	0.53	92.4286	7.57143	2.02438		1.5	2.02438
1.5	3.78	3.22	54	46	3.82864		1.5	3.82864										2	6.61	0.39	94.4286	5.57143	1.71765		2	1.71765											2	6.69	0.31	95.5714	4.42857	1.48808		2	1.48808
2	4.61	2.39	65.8571	34.1429	3.53055		2	3.53055										2.5	6.75	0.25	96.4286	3.57143	1.27297		2.5	1.27297											2.5	6.85	0.15	97.8571	2.14286	0.76214		2.5	0.76214
2.5	5.28	1.72	75.4286	24.5714	3.20158		2.5	3.20158										3	6.84	0.16	97.7143	2.28571	0.826679		3	0.826679											3	6.9	0.1	98.5714	1.42857	0.356675		3	0.356675
3	5.79	1.21	82.7143	17.2857	2.84988		3	2.84988
																											kLa (30-90 s)		113.7	per hour																kLa (30-90 s)		127.398	per hour
									kLa 30-90 s		32.124	per hour
Internal loop airlift																		Internal loop airlift																			Internal loop airlift
3 vvm with a silicone tube (R3)																		3 vvm with single coarse-bubble air stone (R3)																			3 vvm with single fine-bubble air stone (R3)
minutes	Oxygen (mg/L)		DO (%)	C*-Cl	ln (C*-Cl)		minutes	ln (C*-Cl)										minutes	Oxygen (mg/L)		DO (%)	C*-Cl	ln (C*-Cl)		minutes	ln (C*-Cl)											minutes	Oxygen (mg/L)		DO (%)	C*-Cl	ln (C*-Cl)		minutes	ln (C*-Cl)
0	0.01	6.99	0.142857	99.8571	4.60374		0	4.60374										0	0.01	6.99	0.142857	99.8571	4.60374		0	4.60374											0	0.01	6.99	0.142857	99.8571	4.60374		0	4.60374
0.5	1.58	5.42	22.5714	77.4286	4.34936		0.5	4.34936										0.5	1.97	5.03	28.1429	71.8571	4.27468		0.5	4.27468											0.5	2.58	4.42	36.8571	63.1429	4.1454		0.5	4.1454
1	2.75	4.25	39.2857	60.7143	4.10618		1	4.10618										1	4.78	2.22	68.2857	31.7143	3.45677		1	3.45677											1	5.29	1.71	75.5714	24.4286	3.19575		1	3.19575
1.5	3.66	3.34	52.2857	47.7143	3.86523		1.5	3.86523										1.5	6.2	0.8	88.5714	11.4286	2.43612		1.5	2.43612											1.5	6.41	0.59	91.5714	8.42857	2.13163		1.5	2.13163
2	4.53	2.47	64.7143	35.2857	3.56348		2	3.56348										2	6.62	0.38	94.5714	5.42857	1.69168		2	1.69168											2	6.78	0.22	96.8571	3.14286	1.14513		2	1.14513
2.5	5.19	1.81	74.1429	25.8571	3.25259		2.5	3.25259										2.5	6.71	0.29	95.8571	4.14286	1.42139		2.5	1.42139											2.5	6.86	0.14	98	2	0.693147		2.5	0.693147
3	5.7	1.3	81.4286	18.5714	2.92162		3	2.92162										3	6.83	0.17	97.5714	2.42857	0.887303		3	0.887303											3	6.89	0.11	98.4286	1.57143	0.451985		3	0.451985
																											kLa (30-90 s)		110.316	per hour																kLa (30-90 s)		120.828	per hour
									kLa 30-90 s		29.046	per hour
																		Internal loop airlift																			Internal loop airlift
Internal loop airlift																		3 vvm with single coarse-bubble air stone (R4)																			3 vvm with single fine-bubble air stone (R4)
3 vvm with a silicone tube (R4)
																		minutes	Oxygen (mg/L)		DO (%)	C*-Cl	ln (C*-Cl)		minutes	ln (C*-Cl)											minutes	Oxygen (mg/L)		DO (%)	C*-Cl	ln (C*-Cl)		minutes	ln (C*-Cl)
minutes	Oxygen (mg/L)		DO (%)	C*-Cl	ln (C*-Cl)		minutes	ln (C*-Cl)										0	0.01	6.99	0.142857	99.8571	4.60374		0	4.60374											0	0.01	6.99	0.142857	99.8571	4.60374		0	4.60374
0	0.01	6.99	0.142857	99.8571	4.60374		0	4.60374										0.5	2.05	4.95	29.2857	70.7143	4.25865		0.5	4.25865											0.5	2.52	4.48	36	64	4.15888		0.5	4.15888
0.5	1.51	5.49	21.5714	78.4286	4.36219		0.5	4.36219										1	4.62	2.38	66	34	3.52636		1	3.52636											1	5.23	1.77	74.7143	25.2857	3.23024		1	3.23024
1	2.72	4.28	38.8571	61.1429	4.11321		1	4.11321										1.5	6.1	0.9	87.1429	12.8571	2.5539		1.5	2.5539											1.5	6.4	0.6	91.4286	8.57143	2.14843		1.5	2.14843
1.5	3.73	3.27	53.2857	46.7143	3.84405		1.5	3.84405										2	6.65	0.35	95	5	1.60944		2	1.60944											2	6.67	0.33	95.2857	4.71429	1.5506		2	1.5506
2	4.55	2.45	65	35	3.55535		2	3.55535										2.5	6.77	0.23	96.7143	3.28571	1.18958		2.5	1.18958											2.5	6.88	0.12	98.2857	1.71429	0.538997		2.5	0.538997
2.5	5.22	1.78	74.5714	25.4286	3.23587		2.5	3.23587										3	6.81	0.19	97.2857	2.71429	0.998529		3	0.998529											3	6.91	0.09	98.7143	1.28571	0.251314		3	0.251314
3	5.73	1.27	81.8571	18.1429	2.89828		3	2.89828
																											kLa (30-90 s)		102.282	per hour
																																														kLa (30-90 s)		120.624	per hour
									kLa 30-90 s		31.086	per hour
																		Internal loop airlift																			Internal loop airlift
Internal loop airlift																		3 vvm with single coarse-bubble air stone (R5)																			3 vvm with single fine-bubble air stone (R5)
3 vvm with a silicone tube (R5)
																		minutes	Oxygen (mg/L)		DO (%)	C*-Cl	ln (C*-Cl)		minutes	ln (C*-Cl)											minutes	Oxygen (mg/L)		DO (%)	C*-Cl	ln (C*-Cl)		minutes	ln (C*-Cl)
minutes	Oxygen (mg/L)		DO (%)	C*-Cl	ln (C*-Cl)		minutes	ln (C*-Cl)										0	0.01	6.99	0.142857	99.8571	4.60374		0	4.60374											0	0.01	6.99	0.142857	99.8571	4.60374		0	4.60374
0	0.01	6.99	0.142857	99.8571	4.60374		0	4.60374										0.5	2.02	4.98	28.8571	71.1429	4.26469		0.5	4.26469											0.5	2.56	4.44	36.5714	63.4286	4.14991		0.5	4.14991
0.5	1.48	5.52	21.1429	78.8571	4.36764		0.5	4.36764										1	4.61	2.39	65.8571	34.1429	3.53055		1	3.53055											1	5.28	1.72	75.4286	24.5714	3.20158		1	3.20158
1	2.73	4.27	39	61	4.11087		1	4.11087										1.5	6.11	0.89	87.2857	12.7143	2.54273		1.5	2.54273											1.5	6.4	0.6	91.4286	8.57143	2.14843		1.5	2.14843
1.5	3.72	3.28	53.1429	46.8571	3.8471		1.5	3.8471										2	6.67	0.33	95.2857	4.71429	1.5506		2	1.5506											2	6.6	0.4	94.2857	5.71429	1.74297		2	1.74297
2	4.57	2.43	65.2857	34.7143	3.54715		2	3.54715										2.5	6.77	0.23	96.7143	3.28571	1.18958		2.5	1.18958											2.5	6.89	0.11	98.4286	1.57143	0.451985		2.5	0.451985
2.5	5.24	1.76	74.8571	25.1429	3.22457		2.5	3.22457										3	6.86	0.14	98	2	0.693147		3	0.693147											3	6.9	0.1	98.5714	1.42857	0.356675		3	0.356675
3	5.72	1.28	81.7143	18.2857	2.90612		3	2.90612
																																														kLa (30-90 s)		120.09	per hour
									kLa 30-90 s		31.23	per hour															kLa (30-90 s)		103.32	per hour
Internal loop airlift																		Internal loop airlift																			Internal loop airlift
3 vvm with a silicone tube																		3 vvm with single coarse-bubble air stone																			3 vvm with single fine-bubble air stone
R1	32.676																	R1	103.512																		R1	128.202
R2	32.124																	R2	113.7																		R2	127.398
R3	29.046																	R3	110.316																		R3	120.828
R4	31.086																	R4	102.282																		R4	120.624
R5	31.23																	R5	103.32																		R5	120.09
Mean	31.2324																	Mean	106.626																		Mean	123.428
SD	1.38571																	SD	5.07825																		SD	4.00988

## Sheet: kLa on agitation&aeration rate
kLa values for bioreactors at different agitation speeds and aeration rates.
Stirred tank bioreactor																	Stirred tank bioreactor																	Stirred tank bioreactor
450 rpm 3 vvm with eight cylindered supper-fine bubble air stones (R1)																	450 rpm 2 vvm with eight cylindered supper-fine bubble air stones (R1)																	450 rpm 1 vvm with eight cylindered supper-fine bubble air stones (R1)
minutes	Oxygen (mg/L)		DO (%)	C*-Cl	ln (C*-Cl)		minutes	ln (C*-Cl)									minutes	Oxygen (mg/L)		DO (%)	C*-Cl	ln (C*-Cl)		minutes	ln (C*-Cl)									minutes	Oxygen (mg/L)		DO (%)	C*-Cl	ln (C*-Cl)		minutes	ln (C*-Cl)
0	0.01	7.09	0.140845	99.8592	4.60376		0	4.60376									0	0.01	7.09	0.140845	99.8592	4.60376		0	4.60376									0	0.01	7.09	0.140845	99.8592	4.60376		0	4.60376
0.5	4.59	2.51	64.6479	35.3521	3.56536		0.5	3.56536									0.5	4.1	3	57.7465	42.2535	3.74369		0.5	3.74369									0.5	3	4.1	42.2535	57.7465	4.05606		0.5	4.05606
1	6.33	0.77	89.1549	10.8451	2.38371		1	2.38371									1	5.98	1.12	84.2254	15.7746	2.7584		1	2.7584									1	4.97	2.13	70	30	3.4012		1	3.4012
1.5	6.82	0.28	96.0563	3.94366	1.37211		1.5	1.37211									1.5	6.73	0.37	94.7887	5.21127	1.65082		1.5	1.65082									1.5	6.05	1.05	85.2113	14.7887	2.69387		1.5	2.69387
2	7.02	0.08	98.8732	1.12676	0.119347		2	0.119347									2	6.82	0.28	96.0563	3.94366	1.37211		2	1.37211									2	6.62	0.48	93.2394	6.76056	1.91111		2	1.91111
2.5	7.04	0.06	99.1549	0.84507	-0.168335		2.5	-0.168335									2.5	7	0.1	98.5915	1.40845	0.34249		2.5	0.34249									2.5	6.93	0.17	97.6056	2.39437	0.873119		2.5	0.873119
3	7.05	0.05	99.2958	0.704225	-0.350657		3	-0.350657									3	7.08	0.02	99.7183	0.28169	-1.26695		3	-1.26695									3	7.01	0.09	98.7324	1.26761	0.23713		3	0.23713
									kLa (30-90 s)		131.592	per hour														kLa (30-90 s)		125.574	per hour														kLa (30-90 s)		81.732	per hour
Stirred tank bioreactor																	Stirred tank bioreactor																	Stirred tank bioreactor
450 rpm 3 vvm with eight cylindered supper-fine bubble air stones (R2)																	450 rpm 2 vvm with eight cylindered supper-fine bubble air stones (R2)																	450 rpm 1 vvm with eight cylindered supper-fine bubble air stones (R2)
minutes	Oxygen (mg/L)		DO (%)	C*-Cl	ln (C*-Cl)		minutes	ln (C*-Cl)									minutes	Oxygen (mg/L)		DO (%)	C*-Cl	ln (C*-Cl)		minutes	ln (C*-Cl)									minutes	Oxygen (mg/L)		DO (%)	C*-Cl	ln (C*-Cl)		minutes	ln (C*-Cl)
0	0.01	7.09	0.140845	99.8592	4.60376		0	4.60376									0	0.01	7.09	0.140845	99.8592	4.60376		0	4.60376									0	0.01	7.09	0.140845	99.8592	4.60376		0	4.60376
0.5	4.68	2.42	65.9155	34.0845	3.52884		0.5	3.52884									0.5	4	3.1	56.338	43.662	3.77648		0.5	3.77648									0.5	3.14	3.96	44.2254	55.7746	4.02132		0.5	4.02132
1	6.47	0.63	91.1268	8.87324	2.18304		1	2.18304									1	5.96	1.14	83.9437	16.0563	2.7761		1	2.7761									1	5.08	2.02	71.5493	28.4507	3.34817		1	3.34817
1.5	6.74	0.36	94.9296	5.07042	1.62342		1.5	1.62342									1.5	6.71	0.39	94.507	5.49296	1.70347		1.5	1.70347									1.5	6.16	0.94	86.7606	13.2394	2.5832		1.5	2.5832
2	7.03	0.07	99.0141	0.985915	-0.0141846		2	-0.0141846									2	7.01	0.09	98.7324	1.26761	0.23713		2	0.23713									2	6.7	0.4	94.3662	5.6338	1.72878		2	1.72878
2.5	7.09	0.01	99.8592	0.140845	-1.96009		2.5	-1.96009									2.5	7.03	0.07	99.0141	0.985915	-0.0141846		2.5	-0.0141846									2.5	7.02	0.08	98.8732	1.12676	0.119347		2.5	0.119347
3	7.05	0.05	99.2958	0.704225	-0.350657		3	-0.350657									3	7.04	0.06	99.1549	0.84507	-0.168335		3	-0.168335									3	7.03	0.07	99.0141	0.985915	-0.0141846		3	-0.0141846
									kLa (30-90 s)		114.324	per hour														kLa (30-90 s)		124.38	per hour														kLa (30-90 s)		86.286	per hour
Stirred tank bioreactor																	Stirred tank bioreactor																	Stirred tank bioreactor
450 rpm 3 vvm with eight cylindered supper-fine bubble air stones (R3)																	450 rpm 2 vvm with eight cylindered supper-fine bubble air stones (R3)																	450 rpm 1 vvm with eight cylindered supper-fine bubble air stones (R3)
minutes	Oxygen (mg/L)		DO (%)	C*-Cl	ln (C*-Cl)		minutes	ln (C*-Cl)									minutes	Oxygen (mg/L)		DO (%)	C*-Cl	ln (C*-Cl)		minutes	ln (C*-Cl)									minutes	Oxygen (mg/L)		DO (%)	C*-Cl	ln (C*-Cl)		minutes	ln (C*-Cl)
0	0.01	7.09	0.140845	99.8592	4.60376		0	4.60376									0	0.01	7.09	0.140845	99.8592	4.60376		0	4.60376									0	0.01	7.09	0.140845	99.8592	4.60376		0	4.60376
0.5	4.83	2.27	68.0282	31.9718	3.46486		0.5	3.46486									0.5	4.19	2.91	59.0141	40.9859	3.71323		0.5	3.71323									0.5	3.11	3.99	43.8028	56.1972	4.02887		0.5	4.02887
1	6.39	0.71	90	10	2.30259		1	2.30259									1	6.01	1.09	84.6479	15.3521	2.73125		1	2.73125									1	5	2.1	70.4225	29.5775	3.38701		1	3.38701
1.5	6.75	0.35	95.0704	4.92958	1.59525		1.5	1.59525									1.5	6.78	0.32	95.493	4.50704	1.50564		1.5	1.50564									1.5	6.12	0.98	86.1972	13.8028	2.62487		1.5	2.62487
2	6.97	0.13	98.169	1.83099	0.604855		2	0.604855									2	7.01	0.09	98.7324	1.26761	0.23713		2	0.23713									2	6.78	0.32	95.493	4.50704	1.50564		2	1.50564
2.5	6.99	0.11	98.4507	1.5493	0.4378		2.5	0.4378									2.5	7.02	0.08	98.8732	1.12676	0.119347		2.5	0.119347									2.5	7.01	0.09	98.7324	1.26761	0.23713		2.5	0.23713
3	7	0.1	98.5915	1.40845	0.34249		3	0.34249									3	7.03	0.07	99.0141	0.985915	-0.0141846		3	-0.0141846									3	7.04	0.06	99.1549	0.84507	-0.168335		3	-0.168335
									kLa (30-90 s)		112.176	per hour														kLa (30-90 s)		132.456	per hour														kLa (30-90 s)		84.24	per hour
Stirred tank bioreactor																	Stirred tank bioreactor																	Stirred tank bioreactor
450 rpm 3 vvm with 8 eight cylindered supper-fine bubble air stones (R4)																	450 rpm 2 vvm with eight cylindered supper-fine bubble air stones (R4)																	450 rpm 1 vvm with eight cylindered supper-fine bubble air stones (R4)
minutes	Oxygen (mg/L)		DO (%)	C*-Cl	ln (C*-Cl)		minutes	ln (C*-Cl)									minutes	Oxygen (mg/L)		DO (%)	C*-Cl	ln (C*-Cl)		minutes	ln (C*-Cl)									minutes	Oxygen (mg/L)		DO (%)	C*-Cl	ln (C*-Cl)		minutes	ln (C*-Cl)
0	0.01	7.09	0.140845	99.8592	4.60376		0	4.60376									0	0.01	7.09	0.140845	99.8592	4.60376		0	4.60376									0	0.01	7.09	0.140845	99.8592	4.60376		0	4.60376
0.5	4.77	2.33	67.1831	32.8169	3.49094		0.5	3.49094									0.5	4.07	3.03	57.3239	42.6761	3.75364		0.5	3.75364									0.5	3.08	4.02	43.3803	56.6197	4.03636		0.5	4.03636
1	6.33	0.77	89.1549	10.8451	2.38371		1	2.38371									1	5.88	1.22	82.8169	17.1831	2.84393		1	2.84393									1	4.91	2.19	69.1549	30.8451	3.42898		1	3.42898
1.5	6.9	0.2	97.1831	2.8169	1.03564		1.5	1.03564									1.5	6.75	0.35	95.0704	4.92958	1.59525		1.5	1.59525									1.5	5.99	1.11	84.3662	15.6338	2.74944		1.5	2.74944
2	6.95	0.15	97.8873	2.11268	0.747955		2	0.747955									2	6.98	0.12	98.3099	1.69014	0.524812		2	0.524812									2	6.71	0.39	94.507	5.49296	1.70347		2	1.70347
2.5	7.01	0.09	98.7324	1.26761	0.23713		2.5	0.23713									2.5	6.95	0.15	97.8873	2.11268	0.747955		2.5	0.747955									2.5	6.98	0.12	98.3099	1.69014	0.524812		2.5	0.524812
3	7.04	0.06	99.1549	0.84507	-0.168335		3	-0.168335									3	7.01	0.09	98.7324	1.26761	0.23713		3	0.23713									3	7.03	0.07	99.0141	0.985915	-0.0141846		3	-0.0141846
									kLa (30-90 s)		147.318	per hour														kLa (30-90 s)		129.504	per hour														kLa (30-90 s)		77.214	per hour
Stirred tank bioreactor																	Stirred tank bioreactor																	Stirred tank bioreactor
450 rpm 3 vvm with eight cylindered supper-fine bubble air stones (R5)																	450 rpm 2 vvm with eight cylindered supper-fine bubble air stones (R5)																	450 rpm 1 vvm with eight cylindered supper-fine bubble air stones (R5)
minutes	Oxygen (mg/L)		DO (%)	C*-Cl	ln (C*-Cl)		minutes	ln (C*-Cl)									minutes	Oxygen (mg/L)		DO (%)	C*-Cl	ln (C*-Cl)		minutes	ln (C*-Cl)									minutes	Oxygen (mg/L)		DO (%)	C*-Cl	ln (C*-Cl)		minutes	ln (C*-Cl)
0	0.01	7.09	0.140845	99.8592	4.60376		0	4.60376									0	0.01	7.09	0.140845	99.8592	4.60376		0	4.60376									0	0.01	7.09	0.140845	99.8592	4.60376		0	4.60376
0.5	4.54	2.56	63.9437	36.0563	3.58508		0.5	3.58508									0.5	3.98	3.12	56.0563	43.9437	3.78291		0.5	3.78291									0.5	3.15	3.95	44.3662	55.6338	4.01879		0.5	4.01879
1	6.34	0.76	89.2958	10.7042	2.37064		1	2.37064									1	5.97	1.13	84.0845	15.9155	2.76729		1	2.76729									1	5	2.1	70.4225	29.5775	3.38701		1	3.38701
1.5	6.71	0.39	94.507	5.49296	1.70347		1.5	1.70347									1.5	6.78	0.32	95.493	4.50704	1.50564		1.5	1.50564									1.5	6.1	1	85.9155	14.0845	2.64508		1.5	2.64508
2	6.99	0.11	98.4507	1.5493	0.4378		2	0.4378									2	6.97	0.13	98.169	1.83099	0.604855		2	0.604855									2	6.57	0.53	92.5352	7.46479	2.0102		2	2.0102
2.5	7.01	0.09	98.7324	1.26761	0.23713		2.5	0.23713									2.5	7	0.1	98.5915	1.40845	0.34249		2.5	0.34249									2.5	6.96	0.14	98.0282	1.97183	0.678963		2.5	0.678963
3	7.02	0.08	98.8732	1.12676	0.119347		3	0.119347									3	6.94	0.16	97.7465	2.25352	0.812494		3	0.812494									3	7.01	0.09	98.7324	1.26761	0.23713		3	0.23713
									kLa (30-90 s)		112.896	per hour														kLa (30-90 s)		136.638	per hour														kLa (30-90 s)		82.422	per hour
Stirred tank bioreactor																	Stirred tank bioreactor																	Stirred tank bioreactor
450 rpm 3 vvm with eight cylindered supper-fine bubble air stones																	450 rpm 2 vvm with eight cylindered supper-fine bubble air stones																	450 rpm 1 vvm with eight cylindered supper-fine bubble air stones
R1	131.592																R1	125.574																R1	81.732
R2	114.324																R2	124.38																R2	86.286
R3	112.176																R3	132.456																R3	84.24
R4	147.318																R4	129.504																R4	77.214
R5	112.896																R5	136.638																R5	82.422
Mean	123.661																Mean	129.71																Mean	82.3788
SD	15.4719																SD	5.02731																SD	3.38473
Bubble column bioreactor																	Bubble column bioreactor																	Bubble column bioreactor
2 vvm with eight cylindered supper-fine bubble air stones (R1)																	1 vvm with eight cylindered supper-fine bubble air stones (R1)																	0.5 vvm with eight cylindered supper-fine bubble air stones (R1)
minutes	Oxygen (mg/L)		DO (%)	C*-Cl	ln (C*-Cl)		minutes	ln (C*-Cl)									minutes	Oxygen (mg/L)		DO (%)	C*-Cl	ln (C*-Cl)		minutes	ln (C*-Cl)									minutes	Oxygen (mg/L)		DO (%)	C*-Cl	ln (C*-Cl)		minutes	ln (C*-Cl)
0	0.01	6.74	0.148148	99.8519	4.60369		0	4.60369									0	0.01	6.64	0.150376	99.8496	4.60367		0	4.60367									0	0.01	5.99	0.166667	99.8333	4.6035		0	4.6035
0.5	2.57	4.18	38.0741	61.9259	4.12594		0.5	4.12594									0.5	2.18	4.47	32.782	67.218	4.20794		0.5	4.20794									0.5	1.07	4.93	17.8333	82.1667	4.40875		0.5	4.40875
1	4.65	2.1	68.8889	31.1111	3.43757		1	3.43757									1	3.8	2.85	57.1429	42.8571	3.75787		1	3.75787									1	2.44	3.56	40.6667	59.3333	4.08317		1	4.08317
1.5	5.76	0.99	85.3333	14.6667	2.68558		1.5	2.68558									1.5	4.83	1.82	72.6316	27.3684	3.30939		1.5	3.30939									1.5	3.38	2.62	56.3333	43.6667	3.77659		1.5	3.77659
2	6.24	0.51	92.4444	7.55556	2.02228		2	2.02228									2	5.49	1.16	82.5564	17.4436	2.85897		2	2.85897									2	4.05	1.95	67.5	32.5	3.48124		2	3.48124
2.5	6.47	0.28	95.8519	4.14815	1.42266		2.5	1.42266									2.5	5.93	0.72	89.1729	10.8271	2.38205		2.5	2.38205									2.5	4.61	1.39	76.8333	23.1667	3.14271		2.5	3.14271
3	6.62	0.13	98.0741	1.92593	0.655407		3	0.655407									3	6.13	0.52	92.1805	7.81955	2.05663		3	2.05663									3	5.05	0.95	84.1667	15.8333	2.76212		3	2.76212
									kLa (30-90 s)		86.424	per hour														kLa (30-90 s)		53.916	per hour														kLa (30-90 s)		37.932	per hour
Bubble column bioreactor																	Bubble column bioreactor																	Bubble column bioreactor
2 vvm with eight cylindered supper-fine bubble air stones (R2)																	1 vvm with eight cylindered supper-fine bubble air stones (R2)																	0.5 vvm with eight cylindered supper-fine bubble air stones (R2)
minutes	Oxygen (mg/L)		DO (%)	C*-Cl	ln (C*-Cl)		minutes	ln (C*-Cl)									minutes	Oxygen (mg/L)		DO (%)	C*-Cl	ln (C*-Cl)		minutes	ln (C*-Cl)									minutes	Oxygen (mg/L)		DO (%)	C*-Cl	ln (C*-Cl)		minutes	ln (C*-Cl)
0	0.01	6.74	0.148148	99.8519	4.60369		0	4.60369									0	0.01	6.64	0.150376	99.8496	4.60367		0	4.60367									0	0.01	5.99	0.166667	99.8333	4.6035		0	4.6035
0.5	2.5	4.25	37.037	62.963	4.14255		0.5	4.14255									0.5	2.1	4.55	31.5789	68.4211	4.22568		0.5	4.22568									0.5	1.01	4.99	16.8333	83.1667	4.42085		0.5	4.42085
1	4.59	2.16	68	32	3.46574		1	3.46574									1	3.73	2.92	56.0902	43.9098	3.78214		1	3.78214									1	2.37	3.63	39.5	60.5	4.10264		1	4.10264
1.5	5.69	1.06	84.2963	15.7037	2.7539		1.5	2.7539									1.5	4.78	1.87	71.8797	28.1203	3.33649		1.5	3.33649									1.5	3.28	2.72	54.6667	45.3333	3.81404		1.5	3.81404
2	6.19	0.56	91.7037	8.2963	2.11581		2	2.11581									2	5.39	1.26	81.0526	18.9474	2.94167		2	2.94167									2	4	2	66.6667	33.3333	3.50656		2	3.50656
2.5	6.39	0.36	94.6667	5.33333	1.67398		2.5	1.67398									2.5	5.86	0.79	88.1203	11.8797	2.47483		2.5	2.47483									2.5	4.57	1.43	76.1667	23.8333	3.17109		2.5	3.17109
3	6.58	0.17	97.4815	2.51852	0.923671		3	0.923671									3	6.09	0.56	91.5789	8.42105	2.13073		3	2.13073									3	4.95	1.05	82.5	17.5	2.8622		3	2.8622
									kLa (30-90 s)		83.322	per hour														kLa (30-90 s)		53.352	per hour														kLa (30-90 s)		36.408	per hour
Bubble column bioreactor																	Bubble column bioreactor																	Bubble column bioreactor
2 vvm with eight cylindered supper-fine bubble air stones (R3)																	1 vvm with eight cylindered supper-fine bubble air stones (R3)																	0.5 vvm with eight cylindered supper-fine bubble air stones (R3)
minutes	Oxygen (mg/L)		DO (%)	C*-Cl	ln (C*-Cl)		minutes	ln (C*-Cl)									minutes	Oxygen (mg/L)		DO (%)	C*-Cl	ln (C*-Cl)		minutes	ln (C*-Cl)									minutes	Oxygen (mg/L)		DO (%)	C*-Cl	ln (C*-Cl)		minutes	ln (C*-Cl)
0	0.01	6.74	0.148148	99.8519	4.60369		0	4.60369									0	0.01	6.64	0.150376	99.8496	4.60367		0	4.60367									0	0.01	5.99	0.166667	99.8333	4.6035		0	4.6035
0.5	2.6	4.15	38.5185	61.4815	4.11874		0.5	4.11874									0.5	2.14	4.51	32.1805	67.8195	4.21685		0.5	4.21685									0.5	1.07	4.93	17.8333	82.1667	4.40875		0.5	4.40875
1	4.66	2.09	69.037	30.963	3.43279		1	3.43279									1	3.77	2.88	56.6917	43.3083	3.76834		1	3.76834									1	2.39	3.61	39.8333	60.1667	4.09712		1	4.09712
1.5	5.73	1.02	84.8889	15.1111	2.71543		1.5	2.71543									1.5	4.82	1.83	72.4812	27.5188	3.31487		1.5	3.31487									1.5	3.31	2.69	55.1667	44.8333	3.80295		1.5	3.80295
2	6.26	0.49	92.7407	7.25926	1.98228		2	1.98228									2	5.41	1.24	81.3534	18.6466	2.92566		2	2.92566									2	4.03	1.97	67.1667	32.8333	3.49144		2	3.49144
2.5	6.4	0.35	94.8148	5.18519	1.64581		2.5	1.64581									2.5	5.87	0.78	88.2707	11.7293	2.46209		2.5	2.46209									2.5	4.59	1.41	76.5	23.5	3.157		2.5	3.157
3	6.61	0.14	97.9259	2.07407	0.729515		3	0.729515									3	6.1	0.55	91.7293	8.27068	2.11272		3	2.11272									3	5	1	83.3333	16.6667	2.81341		3	2.81341
									kLa (30-90 s)		84.198	per hour														kLa (30-90 s)		54.12	per hour														kLa (30-90 s)		36.348	per hour
Bubble column bioreactor																	Bubble column bioreactor																	Bubble column bioreactor
2 vvm with eight cylindered supper-fine bubble air stones (R4)																	1 vvm with eight cylindered supper-fine bubble air stones (R4)																	0.5 vvm with eight cylindered supper-fine bubble air stones (R4)
minutes	Oxygen (mg/L)		DO (%)	C*-Cl	ln (C*-Cl)		minutes	ln (C*-Cl)									minutes	Oxygen (mg/L)		DO (%)	C*-Cl	ln (C*-Cl)		minutes	ln (C*-Cl)									minutes	Oxygen (mg/L)		DO (%)	C*-Cl	ln (C*-Cl)		minutes	ln (C*-Cl)
0	0.01	6.74	0.148148	99.8519	4.60369		0	4.60369									0	0.01	6.64	0.150376	99.8496	4.60367		0	4.60367									0	0.01	5.99	0.166667	99.8333	4.6035		0	4.6035
0.5	2.55	4.2	37.7778	62.2222	4.13071		0.5	4.13071									0.5	2.19	4.46	32.9323	67.0677	4.2057		0.5	4.2057									0.5	1.09	4.91	18.1667	81.8333	4.40468		0.5	4.40468
1	4.7	2.05	69.6296	30.3704	3.41347		1	3.41347									1	3.79	2.86	56.9925	43.0075	3.76137		1	3.76137									1	2.41	3.59	40.1667	59.8333	4.09156		1	4.09156
1.5	5.78	0.97	85.6296	14.3704	2.66517		1.5	2.66517									1.5	4.88	1.77	73.3835	26.6165	3.28153		1.5	3.28153									1.5	3.39	2.61	56.5	43.5	3.77276		1.5	3.77276
2	6.29	0.46	93.1852	6.81481	1.9191		2	1.9191									2	5.47	1.18	82.2556	17.7444	2.87607		2	2.87607									2	4.08	1.92	68	32	3.46574		2	3.46574
2.5	6.48	0.27	96	4	1.38629		2.5	1.38629									2.5	5.91	0.74	88.8722	11.1278	2.40945		2.5	2.40945									2.5	4.65	1.35	77.5	22.5	3.11352		2.5	3.11352
3	6.66	0.09	98.6667	1.33333	0.287682		3	0.287682									3	6.16	0.49	92.6316	7.36842	1.9972		3	1.9972									3	5.08	0.92	84.6667	15.3333	2.73003		3	2.73003
									kLa (30-90 s)		87.93	per hour														kLa (30-90 s)		52.704	per hour														kLa (30-90 s)		37.914	per hour
Bubble column bioreactor																	Bubble column bioreactor																	Bubble column bioreactor
2 vvm with eight cylindered supper-fine bubble air stones (R5)																	1 vvm with eight cylindered supper-fine bubble air stones (R5)																	0.5 vvm with eight cylindered supper-fine bubble air stones (R5)
minutes	Oxygen (mg/L)		DO (%)	C*-Cl	ln (C*-Cl)		minutes	ln (C*-Cl)									minutes	Oxygen (mg/L)		DO (%)	C*-Cl	ln (C*-Cl)		minutes	ln (C*-Cl)									minutes	Oxygen (mg/L)		DO (%)	C*-Cl	ln (C*-Cl)		minutes	ln (C*-Cl)
0	0.01	6.74	0.148148	99.8519	4.60369		0	4.60369									0	0.01	6.64	0.150376	99.8496	4.60367		0	4.60367									0	0.01	5.99	0.166667	99.8333	4.6035		0	4.6035
0.5	2.63	4.12	38.963	61.037	4.11148		0.5	4.11148									0.5	2.22	4.43	33.3835	66.6165	4.19895		0.5	4.19895									0.5	1.12	4.88	18.6667	81.3333	4.39856		0.5	4.39856
1	4.64	2.11	68.7407	31.2593	3.44232		1	3.44232									1	3.84	2.81	57.7444	42.2556	3.74374		1	3.74374									1	2.58	3.42	43	57	4.04305		1	4.04305
1.5	5.84	0.91	86.5185	13.4815	2.60132		1.5	2.60132									1.5	4.9	1.75	73.6842	26.3158	3.27017		1.5	3.27017									1.5	3.49	2.51	58.1667	41.8333	3.73369		1.5	3.73369
2	6.36	0.39	94.2222	5.77778	1.75402		2	1.75402									2	5.7	0.95	85.7143	14.2857	2.65926		2	2.65926									2	4.12	1.88	68.6667	31.3333	3.44468		2	3.44468
2.5	6.52	0.23	96.5926	3.40741	1.22595		2.5	1.22595									2.5	6.02	0.63	90.5263	9.47368	2.24852		2.5	2.24852									2.5	4.69	1.31	78.1667	21.8333	3.08344		2.5	3.08344
3	6.67	0.08	98.8148	1.18519	0.169899		3	0.169899									3	6.19	0.46	93.0827	6.91729	1.93402		3	1.93402									3	5.19	0.81	86.5	13.5	2.60269		3	2.60269
									kLa (30-90 s)		90.612	per hour														kLa (30-90 s)		55.728	per hour														kLa (30-90 s)		39.894	per hour
Bubble column bioreactor																	Bubble column bioreactor																	Bubble column bioreactor
2 vvm with eight cylindered supper-fine bubble air stones																	1 vvm with eight cylindered supper-fine bubble air stones																	0.5 vvm with eight cylindered supper-fine bubble air stones
R1	86.424																R1	53.916																R1	37.932
R2	83.322																R2	53.352																R2	36.408
R3	84.198																R3	54.12																R3	36.348
R4	87.93																R4	52.704																R4	37.914
R5	90.612																R5	55.728																R5	39.894
Mean	86.4972																Mean	53.964																Mean	37.6992
SD	2.93079																SD	1.12921																SD	1.45004
Internal loop airlift																	Internal loop airlift																	Internal loop airlift
2 vvm with eight cylindered supper-fine bubble air stones (R1)																	1 vvm with eight cylindered supper-fine bubble air stones (R1)																	0.5 vvm with eight cylindered supper-fine bubble air stones (R1)
minutes	Oxygen (mg/L)		DO (%)	C*-Cl	ln (C*-Cl)		minutes	ln (C*-Cl)									minutes	Oxygen (mg/L)		DO (%)	C*-Cl	ln (C*-Cl)		minutes	ln (C*-Cl)									minutes	Oxygen (mg/L)		DO (%)	C*-Cl	ln (C*-Cl)		minutes	ln (C*-Cl)
0	0.01	6.99	0.142857	99.8571	4.60374		0	4.60374									0	0.01	6.99	0.142857	99.8571	4.60374		0	4.60374									0	0.01	6.99	0.142857	99.8571	4.60374		0	4.60374
0.5	2.52	4.48	36	64	4.15888		0.5	4.15888									0.5	2.29	4.71	32.7143	67.2857	4.20895		0.5	4.20895									0.5	1.91	5.09	27.2857	72.7143	4.28654		0.5	4.28654
1	5.01	1.99	71.5714	28.4286	3.34739		1	3.34739									1	3.65	3.35	52.1429	47.8571	3.86822		1	3.86822									1	3.24	3.76	46.2857	53.7143	3.98368		1	3.98368
1.5	6.05	0.95	86.4286	13.5714	2.60797		1.5	2.60797									1.5	4.62	2.38	66	34	3.52636		1.5	3.52636									1.5	4.41	2.59	63	37	3.61092		1.5	3.61092
2	6.51	0.49	93	7	1.94591		2	1.94591									2	5.42	1.58	77.4286	22.5714	3.11668		2	3.11668									2	5.13	1.87	73.2857	26.7143	3.2852		2	3.2852
2.5	6.72	0.28	96	4	1.38629		2.5	1.38629									2.5	5.94	1.06	84.8571	15.1429	2.71753		2.5	2.71753									2.5	5.78	1.22	82.5714	17.4286	2.85811		2.5	2.85811
3	6.9	0.1	98.5714	1.42857	0.356675		3	0.356675									3	6.21	0.79	88.7143	11.2857	2.42354		3	2.42354									3	6.2	0.8	88.5714	11.4286	2.43612		3	2.43612
									kLa (30-90 s)		93.054	per hour														kLa (30-90 s)		44.034	per hour														kLa (30-90 s)		40.536	per hour
Internal loop airlift																	Internal loop airlift																	Internal loop airlift
2 vvm with eight cylindered supper-fine bubble air stones (R2)																	1 vvm with eight cylindered supper-fine bubble air stones (R2)																	0.5 vvm with eight cylindered supper-fine bubble air stones (R2)
minutes	Oxygen (mg/L)		DO (%)	C*-Cl	ln (C*-Cl)		minutes	ln (C*-Cl)									minutes	Oxygen (mg/L)		DO (%)	C*-Cl	ln (C*-Cl)		minutes	ln (C*-Cl)									minutes	Oxygen (mg/L)		DO (%)	C*-Cl	ln (C*-Cl)		minutes	ln (C*-Cl)
0	0.01	6.99	0.142857	99.8571	4.60374		0	4.60374									0	0.01	6.99	0.142857	99.8571	4.60374		0	4.60374									0	0.01	6.99	0.142857	99.8571	4.60374		0	4.60374
0.5	2.54	4.46	36.2857	63.7143	4.15441		0.5	4.15441									0.5	2.29	4.71	32.7143	67.2857	4.20895		0.5	4.20895									0.5	1.98	5.02	28.2857	71.7143	4.27269		0.5	4.27269
1	4.83	2.17	69	31	3.43399		1	3.43399									1	3.87	3.13	55.2857	44.7143	3.80029		1	3.80029									1	3.28	3.72	46.8571	53.1429	3.97298		1	3.97298
1.5	5.95	1.05	85	15	2.70805		1.5	2.70805									1.5	4.72	2.28	67.4286	32.5714	3.48344		1.5	3.48344									1.5	4.54	2.46	64.8571	35.1429	3.55942		1.5	3.55942
2	6.47	0.53	92.4286	7.57143	2.02438		2	2.02438									2	5.56	1.44	79.4286	20.5714	3.0239		2	3.0239									2	5.25	1.75	75	25	3.21888		2	3.21888
2.5	6.78	0.22	96.8571	3.14286	1.14513		2.5	1.14513									2.5	6.04	0.96	86.2857	13.7143	2.61844		2.5	2.61844									2.5	5.93	1.07	84.7143	15.2857	2.72692		2.5	2.72692
3	6.82	0.18	97.4286	2.57143	0.944462		3	0.944462									3	6.37	0.63	91	9	2.19722		3	2.19722									3	6.3	0.7	90	10	2.30259		3	2.30259
									kLa (30-90 s)		86.784	per hour														kLa (30-90 s)		43.53	per hour														kLa (30-90 s)		42.798	per hour
Internal loop airlift																	Internal loop airlift																	Internal loop airlift
2 vvm with eight cylindered supper-fine bubble air stones (R3)																	1 vvm with eight cylindered supper-fine bubble air stones (R3)																	0.5 vvm with eight cylindered supper-fine bubble air stones (R3)
minutes	Oxygen (mg/L)		DO (%)	C*-Cl	ln (C*-Cl)		minutes	ln (C*-Cl)									minutes	Oxygen (mg/L)		DO (%)	C*-Cl	ln (C*-Cl)		minutes	ln (C*-Cl)									minutes	Oxygen (mg/L)		DO (%)	C*-Cl	ln (C*-Cl)		minutes	ln (C*-Cl)
0	0.01	6.99	0.142857	99.8571	4.60374		0	4.60374									0	0.01	6.99	0.142857	99.8571	4.60374		0	4.60374									0	0.01	6.99	0.142857	99.8571	4.60374		0	4.60374
0.5	2.57	4.43	36.7143	63.2857	4.14766		0.5	4.14766									0.5	2.32	4.68	33.1429	66.8571	4.20256		0.5	4.20256									0.5	1.95	5.05	27.8571	72.1429	4.27865		0.5	4.27865
1	5.02	1.98	71.7143	28.2857	3.34236		1	3.34236									1	3.75	3.25	53.5714	46.4286	3.83792		1	3.83792									1	3.25	3.75	46.4286	53.5714	3.98102		1	3.98102
1.5	6.06	0.94	86.5714	13.4286	2.59738		1.5	2.59738									1.5	4.54	2.46	64.8571	35.1429	3.55942		1.5	3.55942									1.5	4.48	2.52	64	36	3.58352		1.5	3.58352
2	6.5	0.5	92.8571	7.14286	1.96611		2	1.96611									2	5.49	1.51	78.4286	21.5714	3.07137		2	3.07137									2	5.2	1.8	74.2857	25.7143	3.24705		2	3.24705
2.5	6.8	0.2	97.1429	2.85714	1.04982		2.5	1.04982									2.5	6	1	85.7143	14.2857	2.65926		2.5	2.65926									2.5	5.8	1.2	82.8571	17.1429	2.84158		2.5	2.84158
3	6.85	0.15	97.8571	2.14286	0.76214		3	0.76214									3	6.25	0.75	89.2857	10.7143	2.37158		3	2.37158									3	6.25	0.75	89.2857	10.7143	2.37158		3	2.37158
									kLa (30-90 s)		93.018	per hour														kLa (30-90 s)		38.586	per hour														kLa (30-90 s)		41.706	per hour
Internal loop airlift																	Internal loop airlift																	Internal loop airlift
2 vvm with eight cylindered supper-fine bubble air stones (R4)																	1 vvm with eight cylindered supper-fine bubble air stones (R4)																	0.5 vvm with eight cylindered supper-fine bubble air stones (R4)
minutes	Oxygen (mg/L)		DO (%)	C*-Cl	ln (C*-Cl)		minutes	ln (C*-Cl)									minutes	Oxygen (mg/L)		DO (%)	C*-Cl	ln (C*-Cl)		minutes	ln (C*-Cl)									minutes	Oxygen (mg/L)		DO (%)	C*-Cl	ln (C*-Cl)		minutes	ln (C*-Cl)
0	0.01	6.99	0.142857	99.8571	4.60374		0	4.60374									0	0.01	6.99	0.142857	99.8571	4.60374		0	4.60374									0	0.01	6.99	0.142857	99.8571	4.60374		0	4.60374
0.5	2.48	4.52	35.4286	64.5714	4.16777		0.5	4.16777									0.5	2.25	4.75	32.1429	67.8571	4.2174		0.5	4.2174									0.5	1.88	5.12	26.8571	73.1429	4.29241		0.5	4.29241
1	4.84	2.16	69.1429	30.8571	3.42937		1	3.42937									1	3.68	3.32	52.5714	47.4286	3.85922		1	3.85922									1	3.2	3.8	45.7143	54.2857	3.99426		1	3.99426
1.5	6.01	0.99	85.8571	14.1429	2.64921		1.5	2.64921									1.5	4.67	2.33	66.7143	33.2857	3.50513		1.5	3.50513									1.5	4.38	2.62	62.5714	37.4286	3.62243		1.5	3.62243
2	6.49	0.51	92.7143	7.28571	1.98592		2	1.98592									2	5.46	1.54	78	22	3.09104		2	3.09104									2	5.1	1.9	72.8571	27.1429	3.30111		2	3.30111
2.5	6.79	0.21	97	3	1.09861		2.5	1.09861									2.5	5.97	1.03	85.2857	14.7143	2.68882		2.5	2.68882									2.5	5.71	1.29	81.5714	18.4286	2.9139		2.5	2.9139
3	6.81	0.19	97.2857	2.71429	0.998529		3	0.998529									3	6.25	0.75	89.2857	10.7143	2.37158		3	2.37158									3	6.17	0.83	88.1429	11.8571	2.47293		3	2.47293
									kLa (30-90 s)		91.116	per hour														kLa (30-90 s)		42.738	per hour														kLa (30-90 s)		40.2	per hour
Internal loop airlift																	Internal loop airlift																	Internal loop airlift
2 vvm with eight cylindered supper-fine bubble air stones (R5)																	1 vvm with eight cylindered supper-fine bubble air stones (R5)																	0.5 vvm with eight cylindered supper-fine bubble air stones (R5)
minutes	Oxygen (mg/L)		DO (%)	C*-Cl	ln (C*-Cl)		minutes	ln (C*-Cl)									minutes	Oxygen (mg/L)		DO (%)	C*-Cl	ln (C*-Cl)		minutes	ln (C*-Cl)									minutes	Oxygen (mg/L)		DO (%)	C*-Cl	ln (C*-Cl)		minutes	ln (C*-Cl)
0	0.01	6.99	0.142857	99.8571	4.60374		0	4.60374									0	0.01	6.99	0.142857	99.8571	4.60374		0	4.60374									0	0.01	6.99	0.142857	99.8571	4.60374		0	4.60374
0.5	2.56	4.44	36.5714	63.4286	4.14991		0.5	4.14991									0.5	2.31	4.69	33	67	4.20469		0.5	4.20469									0.5	2.01	4.99	28.7143	71.2857	4.2667		0.5	4.2667
1	4.8	2.2	68.5714	31.4286	3.44772		1	3.44772									1	3.83	3.17	54.7143	45.2857	3.81299		1	3.81299									1	3.29	3.71	47	53	3.97029		1	3.97029
1.5	5.93	1.07	84.7143	15.2857	2.72692		1.5	2.72692									1.5	4.7	2.3	67.1429	32.8571	3.49217		1.5	3.49217									1.5	4.57	2.43	65.2857	34.7143	3.54715		1.5	3.54715
2	6.54	0.46	93.4286	6.57143	1.88273		2	1.88273									2	5.53	1.47	79	21	3.04452		2	3.04452									2	5.28	1.72	75.4286	24.5714	3.20158		2	3.20158
2.5	6.69	0.31	95.5714	4.42857	1.48808		2.5	1.48808									2.5	6.03	0.97	86.1429	13.8571	2.6288		2.5	2.6288									2.5	5.97	1.03	85.2857	14.7143	2.68882		2.5	2.68882
3	6.87	0.13	98.1429	1.85714	0.619039		3	0.619039									3	6.32	0.68	90.2857	9.71429	2.2736		3	2.2736									3	6.35	0.65	90.7143	9.28571	2.22848		3	2.22848
									kLa (30-90 s)		85.38	per hour														kLa (30-90 s)		42.75	per hour														kLa (30-90 s)		43.17	per hour
Internal loop airlift																	Internal loop airlift																	Internal loop airlift
2 vvm with eight cylindered supper-fine bubble air stones																	1 vvm with eight cylindered supper-fine bubble air stones																	0.5 vvm with eight cylindered supper-fine bubble air stones
R1	93.054																R1	44.034																R1	40.536
R2	86.784																R2	43.53																R2	42.798
R3	93.018																R3	38.586																R3	41.706
R4	91.116																R4	42.738																R4	40.2
R5	85.38																R5	42.75																R5	43.17
Mean	89.8704																Mean	42.3276																Mean	41.682
SD	3.58063																SD	2.16241																SD	1.32002

## Sheet: Biomass2vvmSTB,BCB 1.5vvmILAB
	Biomass during 120 h fermentation of A. limacinum BUCHAXM 122 in different bioreactors with constant initial sugar concentration (60 g/L).
	Bioreactor	Day	Hour	Repeat	Before (g)	After (g)	dry cell weight (g)	dry cell weight g/L	Mean dry cell weight (g/L)	SD
		1
	STB1		0	1	0.0898	0.093	0.0032	3.2	3.55	0.494975
	STB2		0	2	0.0898	0.0937	0.0039	3.9
	BCB1		0	1	0.0905	0.0941	0.0036	3.6	3.4	0.282843
	BCB2		0	2	0.0883	0.0915	0.0032	3.2
	ILAB1		0	1	0.0889	0.0925	0.0036	3.6	3.55	0.0707107
	ILAB2		0	2	0.0896	0.0931	0.0035	3.5
	Shaker1		0	1	0.0881	0.092	0.0039	3.9	3.65	0.353553
	Shaker2		0	2	0.0881	0.0915	0.0034	3.4
		1
	STB1		24	1	0.0906	0.1232	0.0326	32.6	33.8	1.69706
	STB2		24	2	0.0905	0.1255	0.035	35
	BCB1		24	1	0.0896	0.0929	0.0033	3.3	3.25	0.0707107
	BCB2		24	2	0.0891	0.0923	0.0032	3.2
	ILAB1		24	1	0.0888	0.1068	0.018	18	18.1	0.141421
	ILAB2		24	2	0.0917	0.1099	0.0182	18.2
	Shaker1		24	1	0.0906	0.1069	0.0163	16.3	17.35	1.48492
	Shaker2		24	2	0.0895	0.1079	0.0184	18.4
		2
	STB1		48	1	0.0913	0.1346	0.0433	43.3	43.05	0.353553
	STB2		48	2	.0900	0.1328	0.0428	42.8
	BCB1		48	1	0.0901	0.1165	0.0264	26.4	27.5	1.55563
	BCB2		48	2	0.0913	0.1199	0.0286	28.6
	ILAB1		48	1	0.089	0.1258	0.0368	36.8	35.5	1.83848
	ILAB2		48	2	0.089	0.1232	0.0342	34.2
	Shaker1		48	1	0.0882	0.119	0.0308	30.8	29.55	1.76777
	Shaker2		48	2	0.0886	0.1169	0.0283	28.3
		3
	STB1		72	1	0.0905	0.1231	0.0326	32.6	33.75	1.62635
	STB2		72	2	0.0892	0.1241	0.0349	34.9													A
	BCB1		72	1	0.0897	0.1188	0.0291	29.1	29.5	0.565685
	BCB2		72	2	0.0886	0.1185	0.0299	29.9
	ILAB1		72	1	0.0891	0.1245	0.0354	35.4	36.05	0.919239
	ILAB2		72	2	0.0908	0.1275	0.0367	36.7
	Shaker1		72	1	0.0897	0.1212	0.0315	31.5	31.3	0.282843
	Shaker2		72	2	0.0898	0.1209	0.0311	31.1
		4
	STB1		96	1	.0905	0.1199	0.0294	29.4	30.7	1.83848
	STB2		96	2	.0890	0.121	0.032	32
	BCB1		96	1	0.0898	0.1252	0.0354	35.4	34.35	1.48492
	BCB2		96	2	0.0908	0.1241	0.0333	33.3
	ILAB1		96	1	0.0899	0.1256	0.0357	35.7	36.25	0.777817
	ILAB2		96	2	0.0901	0.1269	0.0368	36.8
	Shaker1		96	1	.0898	0.1222	0.0324	32.4	31.9	0.707107
	Shaker2		96	2	.0890	0.1204	0.0314	31.4
		5
	STB1		120	1	.0886	0.1201	0.0315	31.5	30.65	1.20208
	STB2		120	2	.0884	0.1182	0.0298	29.8
	BCB1		120	1	.0897	0.1250	0.0353	35.3	38.55	4.59619
	BCB2		120	2	.0892	0.1310	0.0418	41.8
	ILAB1		120	1	.0891	0.1294	0.0403	40.3	37.6	3.81838
	ILAB2		120	2	.0915	0.1264	0.0349	34.9
	Shaker1		120	1	.0891	0.1222	0.0331	33.1	32.9	0.282843
	Shaker2		120	2	.0893	0.1220	0.0327	32.7

## Sheet: ReducingS2vvmSTB,BCB 1.5vvmILAB
Total sugar during 120 h fermentation of A. limacinum BUCHAXM 122 in different bioreactors with constant initial sugar concentration (60 g/L).
	Bioreactors	hour	dilute	OD		Reducing sugar (g/L)	Mean Reducing sugar (g/L)	SD
	STB1	0	120	0.270425	0.545511	65.4613	63.7906	2.36264
	STB2	0	120	0.253524	0.517667	62.12
	BCB1	0	120	0.270014	0.544833	65.38	65.615	0.33234
	BCB2	0	120	0.272391	0.54875	65.85
	ILAB1	0	120	0.277095	0.5565	66.78	66.16	0.876812
	ILAB2	0	120	0.270823	0.546167	65.54
	Shaker1	0	120	0.255851	0.5215	62.58	61.605	1.37886
	Shaker2	0	120	0.245987	0.50525	60.63
	STB1	24	100	0.155	0.355354	35.5354	36.6886	1.63089
	STB2	24	100	0.169	0.378418	37.8418
	BCB1	24	100	0.334281	0.65071	65.071	63.033	2.88213
	BCB2	24	100	0.30954	0.609951	60.9951
	ILAB1	24	100	0.267	0.539868	53.9868	57.8583	5.47513
	ILAB2	24	100	0.314	0.617298	61.7298
	Shaker1	24	100	0.2996	0.593575	59.3575	60.6755	1.86387
	Shaker2	24	100	0.3156	0.619934	61.9934
	STB1	48	80	0.117	0.292751	23.4201	21.8386	2.23665
	STB2	48	80	0.093	0.253213	20.257
	BCB1	48	200	0.131	0.315815	63.1631	60.1977	4.19371
	BCB2	48	200	0.113	0.286161	57.2323
	ILAB1	48	80	0.06	0.198847	15.9077	13.2545	3.75221
	ILAB2	48	50	0.068	0.212026	10.6013
	Shaker1	48	100	0.06	0.198847	19.8847	21.0091	1.59012
	Shaker2	48	50	0.208	0.442669	22.1334
	STB1	72	60	0.006	0.109885	6.59308	6.00247	0.835248
	STB2	72	50	0.005	0.108237	5.41186
	BCB1	72	150	0.1704	0.380725	57.1087	54.8353	3.21518
	BCB2	72	150	0.152	0.350412	52.5618
	ILAB1	72	80	0.06	0.198847	15.9077	13.6952	3.12898
	ILAB2	72	100	0.009	0.114827	11.4827
	Shaker1	72	60	0.06	0.198847	11.9308	11.0189	1.28957
	Shaker2	72	50	0.062	0.202142	10.1071
	STB1	96	30	0.003	0.104942	3.14827	2.45305	0.983193
	STB2	96	10	0.046	0.175783	1.75783
	BCB1	96	30	0.987	1.72603	51.7809	49.5239	3.19188
	BCB2	96	130	0.16	0.363591	47.2669
	ILAB1	96	30	0.112	0.284514	8.53542	12.626	5.785
	ILAB2	96	10	0.954	1.67166	16.7166
	Shaker1	96	30	0.007	0.111532	3.34596	2.49423	1.20453
	Shaker2	96	10	0.039	0.16425	1.6425
	STB1	120	10	0.07	0.215321	2.15321	2.07084	0.116492
	STB2	120	10	0.06	0.198847	1.98847
	BCB1	120	100	0.1939	0.41944	41.944	41.8699	0.104843
	BCB2	120	100	0.193	0.417957	41.7957
	ILAB1	120	50	0.006	0.109885	5.49423	3.60956	2.66534
	ILAB2	120	10	0.044	0.172488	1.72488
	Shaker1	120	20	0.011	0.118122	2.36244	2.03542	0.462473
	Shaker2	120	10	0.043	0.17084	1.7084

## Sheet: DHA2vvmSTB,BCB 1.5vvmILAB
DHA production during 120 h in different bioreactor types. Aeration provided at 2 vvm for STB and BCB and 1.5 vvm for ILAB.
	Shaker 200 rpm																										Stirred tank bioreactor 600 rpm 2 vvm
	D1 24					D2 48					D3 72					D4 96					D5 120						D1 24					D2 48					D3 72					D4 96					D5 120
Fatty acid	Shaker1	Shaker2				Shaker1	Shaker2				Shaker1	Shaker2				Shaker1	Shaker2				Shaker1	Shaker2					STB1	STB2				STB1	STB2				STB1	STB2				STB1	STB2				STB1	STB2
12:0	0.04739	0.02461				0.02072	0.02315				0.02606	0.03702				0.02672	0.02027				0.02908	0.02724					0.05064	0.02297				0.02767	0.02385				0.01969	0.0186				0.02213	0.02371				0.0159	0.02183
13:0	0.013959	0.14138				0.04611	0.05071				0.05201	0.11572				0.05348	0.09959				0.06425	0.08042					0.12998	0.08278				0.09277	0.08064				0.10742	0.13251				0.09783	0.14484				0.06415	0.06244
14:0	0.42981	0.63157				0.56516	0.59187				0.70969	0.93731				0.69959	0.46995				0.81521	0.80367					0.59486	0.46035				0.56894	0.72699				0.48372	0.4403				0.77247	0.85412				0.6414	0.68541
15:0	2.43714	2.33287				0.70531	0.78952				0.63481	0.79659				0.59448	0.87829				0.61778	0.63092					0.96217	0.60448				0.67836	1.55169				0.63156	0.54302				0.57038	0.56544				0.68183	0.52013
16:0	5.9061	6.30452				6.72257	5.45916				8.51153	9.92673				8.60967	5.46538				9.33003	8.8681					8.2183	6.94107				8.20884	7.61955				8.37872	5.52277				6.97967	8.10047				7.64097	6.95899
16:1	0.06051	0.08847				0	0				0	0.12015				0	0				0	0					0	0				0	0				0	0				0	0				0	0
17:0	0.78403	0.62819				0.23411	0.50456				0.25791	0.42184				0.22106	0.47808				0.24311	0.20546					0.48697	0.23673				0.31928	0.32821				0.3151	0.23103				0.26927	0.22185				0.2643	0.29967
17:1	0.06237	0.06693				0.02481	0.01188				0.03898	0.07998				0.02721	0.07844				0.02842	0.02916					0.05848	0.02426				0.02566	0.02991				0.02	0.0169				0.02088	0.0149				0.02923	0.03
18:0	0.23213	0.24664				0.1927	0.20535				0.27203	0.33665				0.25893	0.19367				0.30289	0.3066					0.51928	0.26692				0.39544	0.34758				0.39084	0.21276				0.34864	0.36957				0.37	0.36507
18:1	0.06132	0.07856				0.02364	0.0446				0.03635	0.11621				0.02428	0.06767				0.0417	0.04703					0.01482	0.02435				0.02327	0.00204				0.02428	0.02142				0.01796	0.01435				0.0237	0.02421
18:3 n-6	0.03768	0.03216				0.01245	0.0095				0.02332	0.013				0.01525	0.01167				0.01962	0.01137					0.04854	0.01307				0.01421	0.01688				0.01522	0.01152				0.01994	0.01001				0.01606	0.01387
18:3 n-3	0.04146	0.04067				0.02346	0.01842				0.03296	0.03862				0.02821	0.03111				0.02806	0.02719					0.08397	0.02656				0.0279	0.01912				0.02775	0.02369				0.02171	0.00994				0.02024	0.0194
20:0	0.03766	0.03269				0.02437	0.01516				0.02964	0.0271				0.0322	0.01546				0.03442	0.02082					0.01426	0.04209				0.06795	0.03023				0.02379	0.02878				0.04465	0.055				0.05561	0.01099
20:2	0	0				0	0				0	0				0	0				0	0					0	0				0	0				0	0				0	0				0	0
20:3	0.01936	0.015				0.01236	0.01133				0.014	0.01857				0.01541	0.01203				0.01469	0.01372					0.02038	0.01714				0.01	0.01579				0.01062	0.01082				0.01883	0.01014				0.01843	0.01299
20:4	0.02564	0.03783				0.01381	0.01838				0.01907	0.0304				0.02235	0.01933				0.02998	0.03701					0.02149	0.02565				0.01275	0.01667				0.01932	0.0116				0.01807	0.014				0.02234	0.01493
20:5	0	0				0	0				0	0				0	0				0	0					0	0				0	0				0	0				0	0				0	0
22:1	0.05588	0.0611				0.04586	0.01378				0.06136	0.09455				0.0971	0.05904				0.11898	0.14656					0.03365	0.05237				0.06432	0.066				0.07174	0.0462				0.09044	0.0366				0.041313	0.036265
22:5	1.31263	1.18283				0.99364	0.78481				0.74023	1.11482				1.36507	0.83888				1.27006	0.88356					1.12968	1.06523				1.05914	1.21615				1.13445	0.88157				1.19798	1.17319				1.29751	1.23098
22:6	5.68051	5.26508				5.19043	4.2581				5.99563	7.38887				7.48899	6.27829				6.83509	6.76446					7.69423	4.99535				6.55032	6.77495				5.20475	4.98072				4.03119	4.51691				4.30719	3.94457
Other	1.66848	2.68633				2.62831	1.72999				4.95429	4.12765				2.76351	2.05179				3.5104	5.34068					0.39499	0.78057				0.94223	0.70038				0.89278	1.09349				1.44358	1.14963				2.20374	1.62713
Total	18.9141	19.8974				17.4798	14.5403				22.4099	25.7418				22.3435	17.0689				23.3338	24.244					20.4767	15.6819				19.0891	19.5666				17.7717	14.2277				15.9856	17.2847				17.7139	15.8789
Hexane	80.5008	79.5634				82.1371	85.1516				77.2359	73.9073				77.2904	82.6457				76.2498	75.3753					79.0013	84.0138				80.536	80.0439				81.7517	86.0005				83.4983	82.1714				81.9525	83.8221
19:0	0.58509	0.53919				0.38306	0.3081				0.35422	0.35089				0.36609	0.28538				0.41644	0.38076					0.52197	0.3043				0.37496	0.38949				0.47654	0.31271				0.51605	0.54396				0.33362	0.29898
Sum Identified	17.2456	17.2111				14.8515	12.8103				17.4556	21.6141				19.58	15.0171				19.8234	18.9033					20.0817	14.9014				18.1468	18.8663				16.879	12.5933				14.542	16.135				15.5102	14.2517
Cell Dry weight (g)	0.1097	0.1099				0.1122	0.1298				0.1148	0.1184				0.1118	0.1111				0.1165	0.1205					0.1249	0.1153				0.1252	0.1204				0.0853	0.10505				0.0623	0.0706				0.1152	0.1149
Int. Std. (mg)	1	1				1	1				1	1				1	1				1	1					1	1				1	1				1	1				1	1				1	1
mg/g dry wt.			Mean	SD				Mean	SD				Mean	SD				Mean	SD				Mean	SD					Mean	SD				Mean	SD				Mean	SD				Mean	SD				Mean
12:0	0.738342	0.41531	0.576826	0.228418		0.482092	0.578875	0.530483	0.0684356		0.640855	0.891074	0.765964	0.176932		0.65284	0.639317	0.646078	0.00956234		0.599399	0.593702	0.596551	0.00402819			0.776758	0.654681	0.715719	0.0863215		0.589413	0.508587	0.549	0.0571525		0.484392	0.565937	0.525165	0.0576611		0.688338	0.61739	0.652864	0.0501673		0.413707	0.635465	0.524586
13:0	0.217483	2.38588	1.30168	1.53329		1.07284	1.26802	1.17043	0.138015		1.279	2.78539	2.0322	1.06517		1.30666	3.14107	2.22387	1.29713		1.32433	1.75277	1.53855	0.302958			1.99374	2.35936	2.17655	0.258532		1.97614	1.7196	1.84787	0.181402		2.64263	4.03185	3.33724	0.982324		3.04293	3.77152	3.40723	0.515192		1.66914	1.81761	1.74337
14:0	6.69649	10.6582	8.67732	2.80132		13.1496	14.7999	13.9748	1.16698		17.4523	22.5611	20.0067	3.61245		17.0928	14.8222	15.9575	1.60554		16.8032	17.5162	17.1597	0.504176			9.12445	13.1207	11.1226	2.82577		12.1193	15.5026	13.811	2.39239		11.9	13.3969	12.6484	1.05849		24.0271	22.2406	23.1339	1.26324		16.6888	19.9521	18.3204
15:0	37.9709	39.3687	38.6698	0.988373		16.4104	19.7423	18.0764	2.35594		15.6109	19.174	17.3925	2.51945		14.5247	27.7013	21.113	9.31726		12.7337	13.7511	13.2424	0.719359			14.7586	17.2286	15.9936	1.74661		14.4501	33.0889	23.7695	13.1796		15.537	16.5223	16.0296	0.696759		17.7413	14.7236	16.2324	2.13379		17.7407	15.1408	16.4408
16:0	92.0177	106.393	99.2053	10.1648		156.414	136.508	146.461	14.0754		209.311	238.937	224.124	20.9486		210.357	172.378	191.368	26.8549		192.311	193.282	192.797	0.686682			126.059	197.831	161.945	50.7507		174.861	162.482	168.672	8.75282		206.124	168.04	187.082	26.9298		217.098	210.93	214.014	4.3611		198.813	202.574	200.693
16:1	0.942753	1.49299	1.21787	0.389075		0	0	0	0		0	2.89202	1.44601	2.04497		0	0	0	0		0	0	0	0			0	0	0	0		0	0	0	0		0	0	0	0		0	0	0	0		0	0	0
17:0	12.2153	10.6011	11.4082	1.14139		5.44704	12.6167	9.03188	5.06973		6.34239	10.1537	8.24806	2.69501		5.40108	15.0787	10.2399	6.84309		5.011	4.47805	4.74453	0.376853			7.46955	6.74718	7.10836	0.510793		6.80115	6.99889	6.90002	0.13982		7.75175	7.02949	7.39062	0.510717		8.37545	5.77681	7.07613	1.83752		6.8769	8.72331	7.8001
17:1	0.971732	1.12949	1.05061	0.11155		0.577254	0.297064	0.437159	0.198124		0.958577	1.92512	1.44185	0.683452		0.664812	2.474	1.56941	1.27929		0.585795	0.635549	0.610672	0.0351815			0.897014	0.691448	0.794231	0.145357		0.546597	0.637813	0.592205	0.0644996		0.492019	0.514212	0.503115	0.015693		0.649457	0.387985	0.518721	0.184889		0.760544	0.873291	0.816918
18:0	3.61661	4.16221	3.88941	0.385796		4.48355	5.13486	4.8092	0.460543		6.68963	8.10319	7.39641	0.999539		6.32634	6.10836	6.21735	0.154136		6.24319	6.68242	6.46281	0.310582			7.96514	7.60764	7.78639	0.252794		8.42348	7.41194	7.91771	0.715263		9.61503	6.47359	8.04431	2.22133		10.8442	9.62332	10.2338	0.863288		9.62714	10.6271	10.1271
18:1	0.955373	1.32575	1.14056	0.261897		0.550032	1.11524	0.832636	0.399663		0.893901	2.79718	1.84554	1.34582		0.593224	2.13432	1.36377	1.08972		0.859523	1.02503	0.942277	0.117031			0.227321	0.694013	0.460667	0.330001		0.495687	0.0435018	0.269594	0.319743		0.597311	0.651741	0.624526	0.038488		0.558633	0.373663	0.466148	0.130793		0.616657	0.704746	0.660702
18:3 n-6	0.587059	0.542721	0.56489	0.0313516		0.289674	0.237551	0.263613	0.0368565		0.573474	0.312911	0.443192	0.184246		0.372598	0.368072	0.370335	0.00319987		0.404409	0.247812	0.32611	0.110731			0.744546	0.372515	0.558531	0.263066		0.302695	0.359956	0.331325	0.04049		0.374426	0.350516	0.362471	0.016907		0.620219	0.260653	0.440436	0.254252		0.41787	0.403752	0.410811
18:3 n-3	0.645952	0.686333	0.666142	0.0285537		0.545844	0.460599	0.503222	0.060277		0.810536	0.929586	0.870061	0.0841812		0.689245	0.981211	0.835228	0.206451		0.578375	0.592613	0.585494	0.0100677			1.288	0.757002	1.0225	0.375473		0.594313	0.407723	0.501018	0.131939		0.682676	0.72081	0.701743	0.0269646		0.675274	0.25883	0.467052	0.29447		0.52663	0.564728	0.545679
20:0	0.586747	0.551665	0.569206	0.0248069		0.567017	0.379082	0.473049	0.13289		0.728892	0.652299	0.690595	0.0541596		0.786731	0.487609	0.63717	0.211511		0.709467	0.453777	0.581622	0.180801			0.218732	1.19963	0.709181	0.693601		1.44744	0.644637	1.04604	0.567666		0.585256	0.875682	0.730469	0.205362		1.38881	1.43216	1.41048	0.0306546		1.44693	0.319916	0.883424
20:2	0	0	0	0		0	0	0	0		0	0	0	0		0	0	0	0		0	0	0	0			0	0	0	0		0	0	0	0		0	0	0	0		0	0	0	0		0	0	0
20:3	0.301631	0.253135	0.277383	0.0342921		0.28758	0.283311	0.285446	0.00301866		0.344281	0.446981	0.395631	0.07262		0.376507	0.379427	0.377967	0.00206468		0.302791	0.299031	0.300911	0.00265918			0.312605	0.488517	0.400561	0.124388		0.213015	0.336713	0.274864	0.0874672		0.261262	0.329217	0.29524	0.0480518		0.585694	0.264038	0.424866	0.227445		0.479536	0.378135	0.428835
20:4 ArA	0.399474	0.638406	0.51894	0.16895		0.321317	0.459599	0.390458	0.09778		0.46896	0.73173	0.600345	0.185807		0.546069	0.609669	0.577869	0.0449718		0.61795	0.806642	0.712296	0.133425			0.329631	0.731065	0.530348	0.283857		0.271594	0.355478	0.313536	0.0593147		0.47529	0.35295	0.41412	0.0865073		0.562054	0.364549	0.463302	0.139657		0.581271	0.434608	0.507939
20:5 EPA	0	0	0	0		0	0	0	0		0	0	0	0		0	0	0	0		0	0	0	0			0	0	0	0		0	0	0	0		0	0	0	0		0	0	0	0		0	0	0
22:1	0.870617	1.0311	0.95086	0.11348		1.06702	0.344574	0.705799	0.510849		1.50893	2.27582	1.89238	0.542273		2.37241	1.86212	2.11727	0.360825		2.45242	3.19431	2.82337	0.524593			0.516151	1.49263	1.00439	0.690473		1.37011	1.40741	1.38876	0.0263733		1.76487	1.40572	1.58529	0.253961		2.81307	0.953036	1.88305	1.31524		1.07493	1.05566	1.0653
22:5 DPA	20.4509	19.961	20.206	0.346439		23.119	19.6245	21.3717	2.47101		18.2034	26.8338	22.5186	6.10263		33.3523	26.4583	29.9053	4.87475		26.1786	19.2574	22.718	4.894			17.328	30.3607	23.8443	9.21556		22.5613	25.9337	24.2475	2.38464		27.9085	26.8233	27.3659	0.767369		37.2623	30.549	33.9056	4.74704		33.7603	35.8335	34.7969
22:6DHA	88.503	88.8516	88.6773	0.246522		120.766	106.475	113.621	10.1048		147.442	177.851	162.646	21.5025		182.976	198.018	190.497	10.6362		140.885	147.433	144.159	4.62989			118.02	142.375	130.198	17.2215		139.532	144.472	142.002	3.49315		128.042	151.547	139.794	16.6208		125.387	117.617	121.502	5.49447		112.07	114.825	113.448
Other	25.9951	45.3336	35.6644	13.6744		61.1529	43.2591	52.206	12.6528		121.833	99.3528	110.593	15.8962		67.5198	64.7136	66.1167	1.98433		72.3566	116.401	94.379	31.1444			6.05868	22.2475	14.1531	11.4472		20.0709	14.9352	17.5031	3.63152		21.9632	33.2713	27.6173	7.99605		44.9015	29.9355	37.4185	10.5826		57.3397	47.3651	52.3524
Total	294.683	335.782	315.233	29.0612		406.703	363.585	385.144	30.4889		551.092	619.606	585.349	48.4467		545.911	538.355	542.133	5.34261		480.957	528.403	504.68	33.5492			314.088	446.96	380.524	93.9544		406.626	417.247	411.936	7.51025		437.202	432.903	435.052	3.03988		497.221	450.08	473.65	33.3341		460.903	462.229	461.566
SUM SFA	154.06	174.536	164.298	14.4789		198.027	191.028	194.527	4.94862		258.055	303.258	280.657	31.963		256.448	240.357	248.403	11.3782		235.736	238.51	237.123	1.96208			168.366	246.749	207.558	55.4253		220.668	228.358	224.513	5.43752		254.64	216.936	235.788	26.6612		283.206	269.116	276.161	9.96325		253.276	259.79	256.533
SUM MUFA	3.74047	4.97933	4.3599	0.876002		2.19431	1.75688	1.97559	0.309311		3.36141	9.89015	6.62578	4.61651		3.63045	6.47044	5.05044	2.00818		3.89774	4.85489	4.37632	0.676805			1.64049	2.87809	2.25929	0.875116		2.4124	2.08873	2.25056	0.22887		2.8542	2.57167	2.71293	0.19978		4.02116	1.71468	2.86792	1.63093		2.45214	2.6337	2.54292
SUM PUFA	110.888	110.933	110.911	0.0319431		145.329	127.541	136.435	12.5781		167.842	207.106	187.474	27.7634		218.312	226.814	222.563	6.01171		168.967	168.637	168.802	0.234006			138.023	175.085	156.554	26.2068		163.475	171.865	167.67	5.93312		157.744	180.124	168.934	15.8251		165.093	149.314	157.203	11.1573		147.836	152.44	150.138
checking	294.683	335.782	315.233	29.0612		406.703	363.585	385.144	30.4889		551.092	619.606	585.349	80.2391		545.911	538.355	542.133	21.3824		480.957	528.403	504.68	34.0173			314.088	446.96	380.524	93.9544		406.626	417.247	411.936	15.231		437.202	432.903	435.052	50.6821		497.221	450.08	473.65	33.3341		460.903	462.229	461.566
% of total FA
12:0	0.250554	0.123684	0.187119	0.0897107		0.118537	0.159213	0.138875	0.0287625		0.116288	0.143813	0.13005	0.019463		0.119587	0.118754	0.119171	0.000589435		0.124626	0.112358	0.118492	0.00867507			0.247306	0.146474	0.19689	0.0712985		0.144952	0.121891	0.133422	0.0163066		0.110794	0.130731	0.120762	0.0140976		0.138437	0.137174	0.137805	0.000893319		0.08976	0.137478	0.113619
13:0	0.0738022	0.710544	0.392173	0.450244		0.26379	0.348756	0.306273	0.0600798		0.232085	0.449542	0.340813	0.153765		0.239354	0.583457	0.411406	0.243318		0.275352	0.331711	0.303532	0.0398521			0.634771	0.527868	0.581319	0.0755913		0.485985	0.41213	0.449058	0.0522235		0.604442	0.931352	0.767897	0.23116		0.611988	0.837968	0.724978	0.159792		0.362145	0.393227	0.377686
14:0	2.27244	3.17413	2.72328	0.637593		3.23321	4.07056	3.65189	0.592091		3.16686	3.6412	3.40403	0.335407		3.13107	2.75325	2.94216	0.267159		3.49369	3.31493	3.40431	0.126406			2.90506	2.93554	2.9203	0.0215547		2.98045	3.71546	3.34796	0.519728		2.72185	3.09467	2.90826	0.263623		4.83228	4.94149	4.88688	0.0772218		3.62088	4.31649	3.96869
15:0	12.8853	11.7245	12.3049	0.820849		4.035	5.42989	4.73244	0.986336		2.83273	3.09454	2.96363	0.185132		2.66064	5.14555	3.90309	1.75709		2.64758	2.60238	2.62498	0.0319612			4.69886	3.85463	4.27674	0.596961		3.55366	7.93029	5.74197	3.09474		3.55373	3.81664	3.68518	0.185905		3.56808	3.27134	3.41971	0.209829		3.84912	3.27561	3.56237
16:0	31.226	31.6851	31.4555	0.324647		38.459	37.5451	38.0021	0.646244		37.9812	38.5627	38.2719	0.411219		38.5332	32.0194	35.2763	4.60592		39.9851	36.5786	38.2818	2.40877			40.1349	44.2616	42.1982	2.91798		43.0029	38.9416	40.9722	2.87179		47.1463	38.817	42.9817	5.88968		43.6622	46.8651	45.2636	2.26477		43.1354	43.8255	43.4804
16:1	0.319921	0.44463	0.382276	0.088183		0	0	0	0		0	0.466751	0.233375	0.330043		0	0	0	0		0	0	0	0			0	0	0	0		0	0	0	0		0	0	0	0		0	0	0	0		0	0	0
17:0	4.14522	3.15714	3.65118	0.698679		1.33932	3.47009	2.4047	1.50668		1.15088	1.63874	1.39481	0.344969		0.98937	2.80088	1.89512	1.28093		1.04188	0.847468	0.944674	0.13747			2.37817	1.50957	1.94387	0.614191		1.67258	1.6774	1.67499	0.00340455		1.77304	1.6238	1.69842	0.105525		1.68445	1.28351	1.48398	0.28351		1.49205	1.88722	1.68964
17:1	0.329755	0.336375	0.333065	0.00468134		0.141935	0.0817041	0.11182	0.0425897		0.173941	0.310701	0.242321	0.0967039		0.12178	0.459548	0.290664	0.238838		0.121798	0.120277	0.121038	0.00107508			0.285593	0.1547	0.220147	0.0925552		0.134423	0.152862	0.143642	0.0130388		0.112538	0.118782	0.11566	0.00441533		0.130617	0.0862036	0.10841	0.0314053		0.165012	0.18893	0.176971
18:0	1.22729	1.23956	1.23342	0.00867551		1.10241	1.41228	1.25735	0.219112		1.21388	1.3078	1.26084	0.0664053		1.15886	1.13463	1.14675	0.0171304		1.29808	1.26464	1.28136	0.0236395			2.53596	1.70209	2.11902	0.589636		2.07155	1.77639	1.92397	0.208711		2.19922	1.49539	1.84731	0.497681		2.18096	2.13814	2.15955	0.0302802		2.08875	2.29909	2.19392
18:1	0.324203	0.394825	0.359514	0.049937		0.135242	0.306734	0.220988	0.121264		0.162205	0.451445	0.306825	0.204523		0.108667	0.396451	0.252559	0.203494		0.178711	0.193986	0.186349	0.0108014			0.072375	0.155274	0.113825	0.0586186		0.121902	0.0104259	0.0661641	0.0788257		0.136621	0.150551	0.143586	0.00985004		0.112351	0.0830215	0.0976863	0.020739		0.133793	0.152467	0.14313
18:3 n-6	0.199217	0.161629	0.180423	0.0265787		0.071225	0.0653358	0.0682804	0.00416429		0.104061	0.0505016	0.0772814	0.0378725		0.0682525	0.0683698	0.0683111	8.29557e-05		0.0840841	0.0468983	0.0654912	0.0262944			0.23705	0.0833443	0.160197	0.108686		0.0744406	0.0862693	0.080355	0.00836419		0.0856415	0.0809688	0.0833052	0.00330411		0.124737	0.0579126	0.0913248	0.0472521		0.0906632	0.0873488	0.089006
18:3 n-3	0.219202	0.204398	0.2118	0.0104678		0.134212	0.126683	0.130447	0.00532399		0.147078	0.150028	0.148553	0.00208626		0.126256	0.182261	0.154258	0.0396015		0.120255	0.112152	0.116203	0.00572989			0.410076	0.169367	0.289721	0.170207		0.146157	0.0977174	0.121937	0.034252		0.156147	0.166506	0.161326	0.00732526		0.13581	0.0575076	0.0966586	0.0553678		0.11426	0.122175	0.118218
20:0	0.199111	0.164293	0.181702	0.0246204		0.139418	0.104262	0.12184	0.0248589		0.132263	0.105276	0.11877	0.0190826		0.144113	0.0905739	0.117344	0.0378582		0.147512	0.085877	0.116694	0.0435822			0.0696402	0.268398	0.169019	0.140543		0.355963	0.154498	0.25523	0.142458		0.133864	0.202281	0.168073	0.0483784		0.279314	0.318201	0.298757	0.0274976		0.313934	0.0692115	0.191573
20:2	0	0	0	0		0	0	0	0		0	0	0	0		0	0	0	0		0	0	0	0			0	0	0	0		0	0	0	0		0	0	0	0		0	0	0	0		0	0	0
20:3	0.102358	0.0753866	0.0888722	0.0190714		0.0707101	0.0779215	0.0743158	0.00509924		0.0624725	0.0721395	0.067306	0.00683564		0.0689686	0.0704789	0.0697237	0.00106796		0.062956	0.0565914	0.0597737	0.00450043			0.0995278	0.109298	0.104413	0.00690836		0.0523861	0.0806986	0.0665423	0.02002		0.0597578	0.0760488	0.0679033	0.0115195		0.117793	0.0586647	0.088229	0.0418103		0.104043	0.0818068	0.0929247
20:4 ArA	0.135561	0.190125	0.162843	0.0385829		0.0790054	0.126408	0.102706	0.0335184		0.0850964	0.118096	0.101596	0.0233342		0.100029	0.113247	0.106638	0.00934624		0.128483	0.152657	0.14057	0.017093			0.104949	0.163564	0.134256	0.0414473		0.0667922	0.0851961	0.0759941	0.0130135		0.108712	0.0815311	0.0951215	0.0192197		0.113039	0.0809966	0.0970179	0.0226574		0.126116	0.0940243	0.11007
20:5 EPA	0	0	0	0		0	0	0	0		0	0	0	0		0	0	0	0		0	0	0	0			0	0	0	0		0	0	0	0		0	0	0	0		0	0	0	0		0	0	0
22:1	0.295442	0.307075	0.301258	0.00822595		0.26236	0.0947713	0.178565	0.118503		0.273808	0.367302	0.320555	0.0661101		0.434578	0.345891	0.390235	0.0627109		0.509905	0.604521	0.557213	0.0669041			0.164333	0.333951	0.249142	0.119938		0.336947	0.337309	0.337128	0.000255891		0.403674	0.324719	0.364197	0.0558301		0.565758	0.211748	0.388753	0.250323		0.233223	0.228385	0.230804
22:5 DPA	6.93997	5.94463	6.4423	0.703813		5.6845	5.39749	5.541	0.202943		3.30314	4.33078	3.81696	0.72665		6.10947	4.91466	5.51206	0.84486		5.44301	3.64445	4.54373	1.27177			5.51691	6.79272	6.15481	0.902135		5.54842	6.21543	5.88192	0.471649		6.38345	6.19615	6.2898	0.132436		7.49411	6.78746	7.14079	0.499678		7.32481	7.75231	7.53856
22:6 DHA	30.0333	26.4611	28.2472	2.5259		29.6938	29.2849	29.4894	0.289182		26.7544	28.7038	27.7291	1.37842		33.5175	36.782	35.1497	2.30831		29.2927	27.9016	28.5972	0.98364			37.5756	31.8542	34.7149	4.04564		34.3145	34.625	34.4698	0.219543		29.2866	35.0072	32.1469	4.04504		25.2176	26.1325	25.675	0.646905		24.3153	24.8416	24.5785
Other	8.82138	13.5009	11.1611	3.30892		15.0363	11.8979	13.4671	2.21914		22.1076	16.0348	19.0712	4.29412		12.3683	12.0206	12.1944	0.24585		15.0443	22.0289	18.5366	4.93887			1.92897	4.97751	3.45324	2.15564		4.93597	3.57946	4.25772	0.959197		5.02359	7.68564	6.35462	1.88235		9.03049	6.65115	7.84082	1.68245		12.4407	10.2471	11.3439
Total	100	100	100	1.16087e-06		100	100	100	2.08137e-07		100	100	100	6.94521e-07		100	100	100	7.31536e-07		100	100	100	3.26762e-07			100	100	100	8.64654e-07		100	100	100	4.62879e-07		100	100	100	3.20933e-07		100	100	100	3.73371e-08		100	100	100
SUM SFA	52.2797	51.9789	52.1293	3.05502		48.6907	52.5402	50.6154	4.06417		46.8262	48.9436	47.8849	1.53544		46.9762	44.6465	45.8114	8.21		49.0138	45.1379	47.0759	2.82036			53.6047	55.2061	54.4054	5.02775		54.268	54.7296	54.4988	6.90936		58.2432	50.1119	54.1776	7.23605		56.9577	59.7929	58.3753	3.0538		54.9521	56.2038	55.5779
SUM MUFA	1.26932	1.48291	1.37611	0.151027		0.539536	0.48321	0.511373	0.282356		0.609954	1.5962	1.10308	0.69738		0.665025	1.20189	0.933458	0.505043		0.810413	0.918785	0.864599	0.0787806			0.522301	0.643925	0.583113	0.271112		0.593272	0.500597	0.546935	0.0921205		0.652834	0.594052	0.623443	0.0700955		0.808727	0.380973	0.59485	0.302467		0.532028	0.569782	0.550905
SUM PUFA	37.6296	33.0373	35.3334	3.32441		35.7335	35.0787	35.4061	0.540232		30.4563	33.4253	31.9408	2.1752		39.9905	42.131	41.0607	3.20326		35.1315	31.9144	33.5229	2.30903			43.9441	39.1724	41.5583	5.27502		40.2027	41.1903	40.6965	0.766842		36.0804	41.6084	38.8444	4.21885		33.2031	33.175	33.189	1.31367		32.0752	32.9793	32.5272
checking	100	100	100			100	100	100			100	100	100			100	100	100			100	100	100				100	100	100			100	100	100			100	100	100			100	100	100			100	100	100
[truncated: 37 more columns]

## Sheet: Biomass 0.1vvm
Biomass during 168 h fermentation of A. limacinum BUCHAXM 122 in different bioreactors with constant initial sugar concentration (60 g/L).
Time (h)	Stirred tank bioreactor 600 rpm 0.1 vvm											Bubble column bioreactor 0.1 vvm											Internal loop airlift-type bioreactor 0.1 vvm													Shaker 200 rpm
	STB1				STB2				Mean dry cell weight (g/L)	SD		BCB1				BCB2				Mean dry cell weight (g/L)	SD		ILAB1					ILAB2					Mean dry cell weight (g/L)	SD		Shaker1				Shaker2				Mean dry cell weight (g/L)	SD
	before	after	dry cell weight (g)	dry cell weight (g/L)	before	after	dry cell weight (g)	dry cell weight (g/L)				before	after	dry cell weight (g)	dry cell weight (g/L)	before	after	dry cell weight (g)	dry cell weight (g/L)				before	after	dry cell weight (g)	dry cell weight (g/2L)	dry cell weight (g/L)	before	after	dry cell weight (g)	dry cell weight (g/2L)	dry cell weight (g/L)				before	after	dry cell weight (g)	dry cell weight (g/L)	before	after	dry cell weight (g)	dry cell weight (g/L)
0	0.0923	0.095	0.0027	1.35	0.0933	0.0959	0.0026	1.3	1.325	0.0353553		0.0959	0.0985	0.0026	1.3	0.0934	0.0963	0.0029	1.45	1.375	0.106066		0.0952	0.0971	0.0019	1.9	0.95	0.0918	0.0952	0.0034	3.4	1.7	1.325	0.53033		0.0946	0.0973	0.0027	1.35	0.0937	0.0965	0.0028	1.4	1.375	0.0353553
24	0.0936	0.0981	0.0045	2.27848	0.0934	0.0983	0.0049	2.51282	2.39565	0.165703		0.0934	0.0962	0.0028	1.4	0.0946	0.0979	0.0033	1.65	1.525	0.176777		0.0948	0.0979	0.0031	3.1	1.55	0.0948	0.0982	0.0034	3.4	1.7	1.625	0.106066		0.0942	0.1093	0.0151	7.55	0.095	0.111	0.016	8	7.775	0.318198
48	0.0928	0.1059	0.0131	13.1	0.0934	0.1053	0.0119	11.9	12.5	0.848528		0.0919	0.0995	0.0076	3.8	0.0928	0.1026	0.0098	4.9	4.35	0.777817		0.0895	0.1028	0.0133	13.4343	6.71717	0.0918	0.1058	0.014	14	7	6.85859	0.19999		0.0914	0.1131	0.0217	21.7	0.0936	0.1112	0.0176	17.6	19.65	2.89914
72	0.0929	0.1172	0.0243	24.3	0.0955	0.1212	0.0257	25.7	25	0.989949		0.0934	0.10201	0.00861	4.78333	0.0938	0.1033	0.0095	4.75	4.76667	0.0235702		0.0938	0.1103	0.0165	33	16.5	0.0938	0.1097	0.0159	31.8	15.9	16.2	0.424264		0.0908	0.1104	0.0196	19.6	0.0933	0.1184	0.0251	25.1	22.35	3.88909
96	0.0921	0.11702	0.02492	24.92	0.0926	0.1155	0.0229	22.9	23.91	1.42836		0.0932	0.1076	0.0144	7.2	0.0928	0.1092	0.0164	8.2	7.7	0.707107		0.0931	0.1151	0.022	44	22	0.0935	0.114305	0.020805	41.61	20.805	21.4025	0.844993		0.0934	0.1184	0.025	25	0.0912	0.115	0.0238	23.8	24.4	0.848528
120	0.0917	0.1159	0.0242	24.2	0.0924	0.1148	0.0224	22.4	23.3	1.27279		0.0939	0.1161	0.0222	22.2	0.0939	0.114	0.0201	20.1	21.15	1.48492		0.0922	0.1154	0.0232	46.4	23.2	0.0954	0.11901	0.02361	47.22	23.61	23.405	0.289914		0.0938	0.1213	0.0275	27.5	0.0929	0.11355	0.02065	20.65	24.075	4.84368
144	0.093	0.115	0.022	22	0.0907	0.1123	0.0216	21.6	21.8	0.282843		0.0906	0.1112	0.0206	20.6	0.0906	0.1098	0.0192	19.2	19.9	0.989949		0.0909	0.1126	0.0217	43.4	21.7	0.0922	0.114	0.0218	43.6	21.8	21.75	0.0707107		0.0918	0.1134	0.0216	21.6	0.0925	0.1156	0.0231	23.1	22.35	1.06066
168	0.0912	0.109	0.0178	17.8	0.0903	0.1095	0.0192	19.2	18.5	0.989949		0.092	0.1096	0.0176	17.6	0.0921	0.1076	0.0155	15.5	16.55	1.48492		0.0922	0.109	0.0168	33.6	16.8	0.0909	0.1071	0.0162	32.4	16.2	16.5	0.424264		0.0922	0.1136	0.0214	21.4	0.0927	0.1153	0.0226	22.6	22	0.848528

## Sheet: Reducing sugar 0.1vvm
Total sugar during 168 h fermentation of A. limacinum BUCHAXM 122 in different bioreactors with constant initial sugar concentration (60 g/L).
	Bioreactors	hour	dilite	OD		Reducing sugar (g/L)		Mean Reducing sugar (g/L)	SD
	STB1	0	52	0.0349693	1.22728	63.8184		62.744	1.51944
	STB2	0	51	0.0169	1.20921	61.6696
	BCB1	0	50	0.0179956	1.2103	60.5152		61.2402	1.02543
	BCB2	0	50	0.046999	1.23931	61.9653
	ILAB1	0	50	0.022997	1.2153	60.7652		61.1645	0.564614
	ILAB2	0	50	0.0389667	1.23127	61.5637
	Shaker1	0	51	0.0230759	1.21538	61.9846		62.2784	0.415587
	Shaker2	0	51	0.0346	1.22691	62.5723
	STB1	24	42	0.047342	1.23965	52.0653		52.0403	0.0353115
	STB2	24	42	0.046153	1.23846	52.0153
	BCB1	24	42	0.0259094	1.21822	51.1651		51.1901	0.0353506
	BCB2	24	42	0.0270998	1.21941	51.2151
	ILAB1	24	42	0.039011	1.23132	51.7154		51.7405	0.0355194
	ILAB2	24	42	0.040207	1.23251	51.7656
	Shaker1	24	42	0.0378207	1.23013	51.6654		51.7903	0.176707
	Shaker2	24	42	0.0437707	1.23608	51.9153
	STB1	48	41	0.047091	1.2394	50.8153		50.5603	0.36074
	STB2	48	41	0.034648	1.22696	50.3052
	BCB1	48	42	0.0294916	1.2218	51.3156		51.3654	0.0704431
	BCB2	48	42	0.0318635	1.22417	51.4152
	ILAB1	48	42	0.0322295	1.22454	51.4306		51.523	0.130762
	ILAB2	48	42	0.0366325	1.22894	51.6155
	Shaker1	48	41	0.019039	1.21135	49.6652		49.6539	0.0159453
	Shaker2	48	41	0.018489	1.2108	49.6427
	STB1	72	41	0.008794	1.2011	49.2452		49.5709	0.460676
	STB2	72	41	0.0246841	1.21699	49.8967
	BCB1	72	42	0.0294776	1.22179	51.315		51.4151	0.141586
	BCB2	72	42	0.034245	1.22655	51.5152
	ILAB1	72	41	0.0219245	1.21423	49.7835		50.3347	0.779428
	ILAB2	72	41	0.0488093	1.24112	50.8858
	Shaker1	72	38	0.026651	1.21896	46.3204		47.5104	1.68283
	Shaker2	72	40	0.0252001	1.21751	48.7003
	STB1	96	21	0.0500594	1.24237	26.0897		25.7831	0.433648
	STB2	96	21	0.020856	1.21316	25.4764
	BCB1	96	42	0.0175798	1.20989	50.8153		50.9903	0.247544
	BCB2	96	42	0.025915	1.21822	51.1654
	ILAB1	96	29	0.0108674	1.20318	34.8921		35.174	0.398735
	ILAB2	96	29	0.0303121	1.22262	35.456
	Shaker1	96	21	0.0247973	1.2171	25.5592		25.5108	0.0684699
	Shaker2	96	21	0.0201863	1.21249	25.4624
	STB1	120	11	0.008	1.20031	13.2034		13.7615	0.789349
	STB2	120	12	0.001	1.19331	14.3197
	BCB1	120	44	0.026225	1.21853	53.6154		53.5274	0.124451
	BCB2	120	44	0.022225	1.21453	53.4394
	ILAB1	120	21	0.037645	1.22995	25.829		25.6332	0.276849
	ILAB2	120	21	0.019001	1.21131	25.4375
	Shaker1	120	11	0.049	1.24131	13.6544		13.5059	0.210011
	Shaker2	120	11	0.022	1.21431	13.3574
	STB1	144	11	0.019	1.21131	13.3244		13.8274	0.711426
	STB2	144	12	0.0019	1.19421	14.3305
	BCB1	144	37	0.0465098	1.23882	45.8362		45.7799	0.0796598
	BCB2	144	37	0.043465	1.23577	45.7236
	ILAB1	144	12	0.001	1.19331	14.3197		13.723	0.843796
	ILAB2	144	11	0.001	1.19331	13.1264
	Shaker1	144	11	0.02899	1.2213	13.4343		13.2803	0.217711
	Shaker2	144	11	0.001	1.19331	13.1264
	STB1	168	11	0.024	1.21631	13.3794		13.5059	0.178898
	STB2	168	11	0.047	1.23931	13.6324
	BCB1	168	32	0.00950976	1.20182	38.4582		38.4152	0.0607265
	BCB2	168	32	0.006826	1.19913	38.3723
	ILAB1	168	12	0.011	1.20331	14.4397		13.882	0.788634
	ILAB2	168	11	0.019001	1.21131	13.3244
	Shaker1	168	11	0.01	1.20231	13.2254		13.1924	0.046669
	Shaker2	168	11	0.004	1.19631	13.1594

## Sheet: DHA 0.1vvm
DHA production at 168 h in different bioreactor types, provided with aeration at 0.1 vvm.
Fatty acid content
	Shaker 200 rpm					Stirred tank bioreactor 600 rpm 0.1 vvm					Bubble column bioreactor 0.1 vvm					Internal loop airlift-type bioreactor 0.1 vvm
Fatty acid	Sh1	Sh2				St1	St2				B1	B2				A1	A2
12:0	0.02253	0.02821				0.01965	0.02115				0.0229	0.0172				0.01096	0.01583
13:0	0.04147	0.04511				0.03296	0.03128				0.07681	0.06832				0.03947	0.03426
14:0	0.80285	0.9539				0.81493	0.79742				0.68496	0.63696				0.52314	0.57455
15:0	0.81261	1.01132				0.52119	0.54676				2.42288	2.16709				0.46703	0.56368
16:0	9.27768	10.8297				13.1055	13.053				8.64581	7.77933				9.86716	11.3132
16:1	0	0.04874				0	0				0.81355	0				0	0
17:0	0.24842	0.32253				0.24093	0.24712				0.02221	0.71684				0.22865	0.28404
17:1	0.02778	0.03567				0.02364	0.02244				0.29259	0.02236				0.01347	0.01418
18:0	0.25972	0.31926				0.47726	0.47053				0.02077	0.24661				0.37116	0.45314
18:1	0.02422	0.041121				0.02134	0.01967				0.02077	0.01156				0.02282	0.02423
18:3 n-6	0.03164	0.01297				0.00678	0.00797				0.01003	0.01016				0.00759	0.01298
18:3 n-3	0.0189	0.02583				0.01455	0.01406				0.02384	0.02321				0.01299	0.01204
20:0	0.02537	0.03331				0.0722	0.0721				0.02467	0.02255				0.03721	0.04109
20:2	0	0				0	0				0	0				0	0
20:3	0.0135	0.02014				0.02221	0.02204				0.01329	0.01278				0.01673	0.01589
20:4 ArA	0.04139	0.04212				0.06462	0.05748				0.01278	0.01231				0.06092	0.07444
20:5 EPA	0	0				0	0				0	0				0	0
22:1	0.18831	0.20708				0.33996	0.30286				0.03948	0.04492				0.38502	0.45197
22:5 DPA	1.53284	2.12985				2.19883	2.05337				0.76087	0.84106				0.39804	2.32089
22:6 DHA	8.02996	11.88				10.7049	9.13236				3.11906	3.67878				10.2288	13.455
Other	0.52872	0.651589				2.25608	0.39959				0.47859	0.51224				0.29233	7.83276
Total	21.9279	28.6384				30.9376	27.2712				17.5059	16.8243				22.9835	37.4941
Hexane	77.8218	71.0609				68.7421	72.443				82.1724	82.8944				76.7308	62.1667
19:0	0.25032	0.30065				0.32031	0.28572				0.32177	0.28137				0.28573	0.33919
Sum Identified	21.3992	27.9868				28.6815	26.8716				17.0273	16.312				22.6912	29.6614
Cell Dry weight (g)	0.1506	0.1505				0.1506	0.1506				0.1506	0.1508				0.1508	0.1505
Int. Std. (mg)	1	1				1	1				1	1				1	1
			Mean	SD				Mean	SD				Mean	SD				Mean	SD
12:0	0.597641	0.623455	0.610548	0.0182532		0.407349	0.491524	0.449437	0.0595205		0.472569	0.405368	0.438968	0.0475182		0.254363	0.3101	0.282231	0.039412
13:0	1.10005	0.996954	1.0485	0.0729018		0.683269	0.726944	0.705107	0.0308831		1.58507	1.61016	1.59761	0.0177436		0.916031	0.671132	0.793581	0.17317
14:0	21.2968	21.0817	21.1892	0.152099		16.8937	18.532	17.7128	1.15843		14.135	15.0118	14.5734	0.620023		12.1412	11.2551	11.6981	0.62657
15:0	21.5557	22.3507	21.9532	0.562158		10.8044	12.7067	11.7555	1.3451		49.999	51.0738	50.5364	0.759964		10.839	11.0421	10.9405	0.143667
16:0	246.104	239.342	242.723	4.78161		271.681	303.351	287.516	22.3944		178.417	183.342	180.88	3.48314		229	221.618	225.309	5.21963
16:1	0	1.07718	0.538589	0.76168		0	0	0	0		16.7886	0	8.39429	11.8713		0	0	0	0
17:0	6.58971	7.12808	6.85889	0.380686		4.99454	5.74305	5.36879	0.529274		0.45833	16.8944	8.67637	11.6221		5.30657	5.56416	5.43537	0.182146
17:1	0.736905	0.788325	0.762615	0.0363593		0.490063	0.521504	0.505783	0.0222317		6.03794	0.526978	3.28246	3.89684		0.312615	0.277777	0.295196	0.0246343
18:0	6.88946	7.05581	6.97263	0.11763		9.89372	10.9351	10.4144	0.736349		0.428614	5.81208	3.12035	3.80669		8.61398	8.87673	8.74535	0.185788
18:1	0.642471	0.908795	0.775633	0.188319		0.442384	0.457129	0.449756	0.0104266		0.428614	0.272445	0.350529	0.110428		0.529613	0.47465	0.502132	0.0388643
18:3 n-6	0.839298	0.286644	0.562971	0.390785		0.140551	0.185222	0.162887	0.0315871		0.206981	0.23945	0.223215	0.022959		0.176151	0.25427	0.21521	0.0552386
18:3 n-3	0.50135	0.570856	0.536103	0.0491481		0.301625	0.326753	0.314189	0.0177682		0.491967	0.547011	0.519489	0.0389221		0.301475	0.235856	0.268666	0.0464
20:0	0.672977	0.736168	0.704572	0.0446831		1.49672	1.6756	1.58616	0.126483		0.509095	0.531456	0.520275	0.0158119		0.86358	0.804927	0.834254	0.0414737
20:2	0	0	0	0		0	0	0	0		0	0	0	0		0	0	0	0
20:3	0.358107	0.445104	0.401606	0.0615161		0.460419	0.512208	0.486313	0.0366201		0.274255	0.301198	0.287726	0.0190514		0.388274	0.311275	0.349775	0.0544467
20:4 ArA	1.09793	0.930873	1.0144	0.118127		1.33959	1.33583	1.33771	0.00265792		0.26373	0.290121	0.276926	0.0186608		1.41385	1.45823	1.43604	0.0313847
20:5 EPA	0	0	0	0		0	0	0	0		0	0	0	0		0	0	0	0
22:1	4.9952	4.57657	4.78589	0.296013		7.04746	7.03844	7.04295	0.00637626		0.814717	1.05867	0.936693	0.172501		8.93565	8.85381	8.89473	0.0578709
22:5 DPA	40.6608	47.0708	43.8658	4.53251		45.5823	47.7201	46.6512	1.51168		15.7015	19.822	17.7617	2.91368		9.23782	45.4648	27.3513	25.6163
22:6DHA	213.007	262.554	237.78	35.0351		221.916	212.235	217.076	6.84542		64.3655	86.7011	75.5333	15.7937		237.393	263.575	250.484	18.5132
Other	14.0251	14.4004	14.2128	0.265429		46.7691	9.28643	28.0278	26.5042		9.87627	12.0724	10.9743	1.55291		6.78447	153.439	80.1117	103.7
Total	581.67	632.924	607.297	36.2419		641.344	633.781	637.562	5.34793		361.254	396.513	378.884	24.9317		533.407	734.486	633.947	142.184
SUM SFA	304.806	299.315	302.061	3.8832		316.854	354.162	335.508	26.3805		246.004	274.682	260.343	20.2779		267.934	260.142	264.038	5.50983
SUM MUFA	6.37458	7.35087	6.86272	0.690346		7.9799	8.01707	7.99849	0.0262821		24.0698	1.85809	12.964	15.7061		9.77788	9.60624	9.69206	0.121369
SUM PUFA	256.464	311.858	284.161	39.1694		269.741	262.315	266.028	5.25042		81.3039	107.901	94.6024	18.8069		248.911	311.299	280.105	44.1153
	581.67	632.924	607.297	44.0083		641.344	633.781	637.562			361.254	396.513	378.884			533.407	734.486	633.947
% of total FA
12:0	0.102746	0.098504	0.100625	0.00299938		0.063515	0.0775543	0.0705346	0.00992728		0.130813	0.102233	0.116523	0.0202092		0.0476864	0.0422199	0.0449532	0.00386536
13:0	0.18912	0.157516	0.173318	0.0223475		0.106537	0.1147	0.110618	0.00577181		0.438767	0.40608	0.422424	0.0231136		0.171732	0.0913743	0.131553	0.0568214
14:0	3.66132	3.33084	3.49608	0.233682		2.63411	2.92403	2.77907	0.205007		3.91275	3.78596	3.84935	0.089654		2.27615	1.53237	1.90426	0.525933
15:0	3.70583	3.53134	3.61858	0.12338		1.68465	2.0049	1.84477	0.226449		13.8404	12.8807	13.3606	0.678585		2.03202	1.50338	1.7677	0.373806
16:0	42.3099	37.8153	40.0626	3.17819		42.3612	47.8637	45.1124	3.89091		49.3881	46.2387	47.8134	2.22695		42.9315	30.1732	36.5523	9.02147
16:1	0	0.170191	0.0850954	0.120343		0	0	0	0		4.6473	0	2.32365	3.28614		0	0	0	0
17:0	1.13289	1.12621	1.12955	0.00472357		0.778761	0.906156	0.842459	0.0900819		0.126872	4.26075	2.19381	2.92309		0.994844	0.757559	0.876201	0.167786
17:1	0.126688	0.124553	0.12562	0.00150963		0.0764119	0.0822845	0.0793482	0.00415257		1.67138	0.132903	0.902143	1.08787		0.0586073	0.0378193	0.0482133	0.0146993
18:0	1.18443	1.1148	1.14961	0.0492364		1.54265	1.72537	1.63401	0.129201		0.118646	1.4658	0.792222	0.95258		1.6149	1.20856	1.41173	0.287322
18:1	0.110453	0.143587	0.12702	0.0234292		0.0689776	0.0721273	0.0705524	0.00222719		0.118646	0.0687102	0.0936781	0.0353099		0.0992886	0.0646234	0.081956	0.024512
18:3 n-6	0.144291	0.0452888	0.0947899	0.0700051		0.0219151	0.0292249	0.02557	0.00516884		0.0572951	0.0603889	0.058842	0.00218766		0.0330237	0.0346188	0.0338212	0.00112788
18:3 n-3	0.0861915	0.0901935	0.0881925	0.00282982		0.0470302	0.0515562	0.0492932	0.00320036		0.136183	0.137955	0.137069	0.00125329		0.0565188	0.0321117	0.0443153	0.0172584
20:0	0.115697	0.116312	0.116005	0.000434829		0.233373	0.264381	0.248877	0.0219261		0.140924	0.134032	0.137478	0.00487321		0.161899	0.10959	0.135745	0.0369875
20:2	0	0	0	0		0	0	0	0		0	0	0	0		0	0	0	0
20:3	0.0615654	0.0703251	0.0659452	0.00619405		0.0717897	0.0808178	0.0763037	0.00638382		0.0759174	0.0759616	0.0759395	3.12616e-05		0.0727914	0.04238	0.0575857	0.0215041
20:4 ArA	0.188755	0.147075	0.167915	0.0294721		0.208872	0.210772	0.209822	0.00134311		0.0730041	0.0731681	0.0730861	0.000115922		0.26506	0.198538	0.231799	0.0470381
20:5 EPA	0	0	0	0		0	0	0	0		0	0	0	0		0	0	0	0
22:1	0.858769	0.723084	0.790926	0.0959432		1.09886	1.11055	1.1047	0.00826624		0.225524	0.266995	0.24626	0.0293241		1.6752	1.20544	1.44032	0.33217
22:5 DPA	6.99036	7.43703	7.2137	0.315846		7.10731	7.52944	7.31837	0.29849		4.34637	4.99908	4.67273	0.461537		1.73185	6.19001	3.96093	3.15239
22:6 DHA	36.6198	41.4827	39.0512	3.43854		34.6017	33.4872	34.0444	0.788118		17.8172	21.8659	19.8416	2.86284		44.505	35.8856	40.1953	6.09487
Other	2.41117	2.27523	2.3432	0.0961296		7.29236	1.46524	4.3788	4.12039		2.73388	3.04465	2.88927	0.219743		1.27191	20.8906	11.0813	13.8725
Total	100	100	100	2.65986e-07		100	100	100	1.87245e-07		100	100	100	3.16641e-07		100	100	100	4.73237e-07
SUM SFA	52.4019	47.2908	49.8464	3.61413		49.4048	55.8808	52.6428	4.57928		68.0973	69.2743	68.6858	0.832288		50.2307	35.4183	42.8245	10.474
SUM MUFA	1.09591	1.16141	1.12866	0.0463195		1.24425	1.26496	1.2546	0.014646		6.66285	0.468608	3.56573	4.37999		1.8331	1.30788	1.57049	0.371382
SUM PUFA	44.091	49.2726	46.6818	3.66394		42.0586	41.389	41.7238	0.473532		22.506	27.2125	24.8592	3.32796		46.6643	42.3832	44.5237	3.02715
	100	100	100			100	100	100			100	100	100			100	100	100
